# Supplementary material for: Development and Characterization of High-Throughput EST-Based SSR Markers for Pogostemon cablin Using Transcriptome Sequencing
Source: MDPI journal article supplement (doi:10.3390/molecules23082014), 2018-08-13
Supplement: s1 [file s1]

>Unigene56788

CAGCAGCAGCAGCATATGATGCAGCAGCATATGATGCAGCAGATCCAAAGACAGAAAGAC  
GCTATTTACGTTTCCCCTCCAACATCGATGCTCATCTCCGCCACAGCATCATATCTTT  
CAGCAACGTCCTATTAACCCTAATCCCACCTTCCAACAACAAATTATCCCTAATCAGCTT  
CATCCCAATCCCAATCCCAATCCCAATCCCAATCCCAATCTTAATTCTTCTGTAACACCA  
ACCAACAATAACCCACCGCAGCAGCAGCAGCAAAAGCCTCTCTCCAGCTGGCTTATCAGGAC  
GCCTGGCGGGTCTGTCACCCCGACTTCAAGCGCCCCTTCTCTTCCCTCGAAGACGCTTGC  
GAGAGGCTATTACCTTACCATGTGGTGGCGGACTATGAAGCAGAAGAAGATGACAAGATT  
CTTGATTCAGCCACTACAGGCCAAGTCCTTTCTCGCTCTCAGCAGTGGGACAATAATATT  
GCAGCTAAAGTTGCAGAATTCACAGCCACATTCGAGAAACAAGTCCTTGCTTTCAATATT  
ATTTCCCGTAAAAGAGGACTTGGGGAGTTTCGTAAGGAAAAGTTGATGATGGAGCAA  
TTGCTGCTACAAGAAAGAGAAGCGATCACTGATTGAATTGAGAGCTGAATTGGATTCGAGG  
CAGAAAGCTAGCAGAGAACTCATGAAGCAAAATATGCGTATGGCAGCCATGGCTCATGTG  
GATCAAGCTCATGCAGAATCACAAACCCATGCTGAGATGATGGCAGAGCCCCCATAAGA  
GCAAATGCACTTGGTTCTCGAGGTAGTAGTACAATACCTGAAATGGGTGAGCAGGAGCGT  
GATTTCCAGCAGGATGACATGATAAATGGGTGGGGCGCCAATACACAGAAGGATGAGAAG  
GAGCCATCTGAGGACTTTCTGAATGATGATGAAACAGAAAATGGAGATGCAGCATTGCAG  
AGTGAGTGGCCTGGAGGAGGTGAGTTAGATCTGAATACGAGG

>Unigene586

ATGTATAACGGAATAGGGTTGCAGACCCCTAGGGGATCCGGAACGAATGGTTACATTCAG  
TCCAATAAGTTCTTTGTGAAGCCGAAGACGAACAAAGTCATCACGGATTCGGCCAAGGGA  
TTCGAATCGGGTCAAGGAACAGCCGGCATGACCCGAAACCCAACCAAGACATTTTAGAC  
CACGATCGCAAGCGTCAAATCCAGCTGAAGCTTCTTGTGTTGGAGGAGAAGCTGATTGAT  
CAAGGATATACAGATGCCGAGATTGCTGAGAAGCTTGATGAGGCAAGGAAGGCGCTTGAG  
GCGAAAGACAAGGAGAGTGGGGAAGGAGGAAATAATATATCAGACAAGGTTTCAGCGACT  
CAGACCCATCAGATAGCTGCATTGAAGGAAAGAAAGATGGAAACACTCAAAGCTGCTCTT  
GGAATAGAAACCGAGGCTGATAAAGAAAAGAAGCGTGGTGATGCTGAGGCCCCAGATTTT  
GAAGAGAGTCTTGAGGAGGGTGAAGTGAAGCATCCACAAAAAGGATGCTGGGAGGGAT  
GATGTGCGAAAAATTGCAAAGAAAAGTGAATCTGATAGGGATGAAATCAAGCGTCGCAAT  
AAGGATAAATTCAAAGGAGCCCTGATGATTCTTCCGATTCAGATAAAATTGTTAGGCGT  
GAGACTAAAGAAAAGCGCAAAAAAGACAGTAGAAGTACAGGTGCTAGTGATGATTCTGAT  
GCAGATGTTAGGAAGAAACGGAAAATGTCGTCTAGTAAACACCGAAAAGGGCATTACAGT  
AGCTCTTCTGACTCCGAATCTCATTCTGATTGATTCAGATTCAGATTCAGATTCAGATTCAGAT  
TCTGGTGGGAAAAAATCTAAGATGTCTCGTCGCAGACATGATTCTGATGACGACTACAGC  
TCTGATGAGAGTCCTAAGAGTGGAAAGGAAAAGTTAAAGAAAGCCTTCAAAGAACAACAT  
GTAGACTCTGATGATGACTGTTCCGGTAAAGGCCGTGTTTCCAATATTAGTAGGTGGAAG  
GGAAAACGACATGATCCTAGTGAAGTCCATGTTTATAAGTGAAGAGCAGACGTCTGAG  
TACAGTTCTGATGATGACGGTCGACGCCGTGATGATGACAGTTTTGATGAAGACCAT  
GTTTCATATGATAAAAAGTTGAAAAGCAAACAACATGATTCAAACGAAGGTGATGTTTAC  
AAGTCAAAGAGCAGACTACATGAGTATAGTTCTGATGACGACCATAGACGCCATCGTAAA  
GGAAATCAAATCAAGAAGGTAGAGAAAGTTAACTTTGATGATAAATATAAGCCAATTAT  
GGCCTCAGATACAAGTCTCTGAGGGAGAATGATTCTACTAAGAGCAGGCGATATGATTCT  
GATGATGAATCATTAGATAAAGGTGAAAAAGGCCGATCACAACAGAAAAGTCCAAAGCA

GAAGACCATTCTGGCGATAATAGTAGAAAGATCAGGGTTGACAAGCAGGATAAAAGTAGCA  
GCAGACGACCATCCCCGTGATAATAGTAGGAAAATCAGGGTTGATAGGAAGGATAAAAGTT  
GCAGCAGATGACCATCCCCGTGATGATAGGAATATCAAGGTTGACAGACATGATAAAAGTT  
GGTCGCAAGTATGGTCAAGATAGTGACTCTGAAGAAGCGACTAAAAAAGGGAACAATAT  
GATAAAAGTAAGGACAGACTGAGTGCTGGAGGTGGTAGACACGATGGTCATTATGAAAGA  
GATCGGAATCGTGATTATGGTAAGGAGGATATTCACAAGGATTTGAATCGGGCTTCAGGG  
GCCAGAGGCAGGGAGAAAGATTCTGCGCATGATTTTGATGATAGGGAGAATAAAAAAGTTT  
AAGGATGATGGAATGGACACATTCAAGAAATTGGAGCAATTATACAAGTCGAAGGGAGAT  
GGAAGTGGAGATAGAAGTGAAGACGGGTGAGGAGTAAGCGGAAATTAGATGATGGACAT  
CAGAATGAAGAACCAGAACGGAAGTCTAGGAAAGCTGGGCTCATCGAAGGAACTGGATAT  
AAGAATGAGGGTGATGATGATCAGGTGATCCAACCCGTAATAGGGATGCATCTCGACAT  
GAAAATAGGAAAGATAATGAGAACCGTGAAGATTACGGACGAAATAGGAGAGAAAGAGGG

>Unigene49299

ATGGCAACTGGATGGATGAAGTCATTGCAGTGCAAGTCAAAGCATTAGACGACGTCGTC  
CACCACCACCACCACCACCTCCTATCCAATCATCCAGCTGCAGAAACAGTTATCAG  
AGTCTCAAAGATATTGTCGAAATTACCAAGAAGCCCCGCCCAAGAAGCCTAAGCCACCC  
AAACGACACCCATCGCCGCCGTTTAAACGGCCCGTTCCGAGGAAACCGGAGCCCGATTTC  
GAATTCCAGCCCGCCGCCAGAACCCGACCCGTCTCCGCCCAATCCTTCTTCCCTTCTCTC  
ACCGAGCTTCCGAAGGACCACCCGTGCGGGAATGTGGTGAGATAATATCCACACCAGC  
TGGAGCGAGAAGAGCTTCCCGGGTCGGGTCGATATGGTGTTCAAGGTCCAGAACCTGACC  
CGGACCCTGAACCGGTTTCGAGGAGTATCGCGGTGTAGTTAAACACAGGGCCGGCGGCC  
GCCGGGAGCGACGGCAGTGAGGACCACGTTTCGCTGCATTGCGGATGGGAATGAGGTCATG  
AGGTTTTACTGCCTAGGCGCCGCCGGCGCTACGAGGCCGGGGCCGGCGCGTGATGCTC  
CAAGGGTGCAAAAGAGCCGCCGTGTGTACGTATTCCGGTAGTGGTGCGGCTCATGAGAAA  
GCCGGTGGGGGGAGAGGGAGGAGGGCCATGCTGTTTGCCGGGTCATAGCGGGTCGGGTC  
GGGAAGAACTCGGGATTGACTCGTTGCTTGTAGAGCGAATCGGGTATGACTCAGTGAGT  
GGTGAAAATGGGGAATTGCTAGTATTTGACTCGCGTGCATTGTTGCCCTGTTTTCTAATC  
ATCTACAAATTG

>Unigene42

GAATCTGCTTCCACTGCTGTACAATTGTCTTCTGCTGCTGCTGCTGCTGCTGCATCAGAT  
CCTGGTGCAAAAGTAAATTCGACTTAAATGAAGGGTTTACTGTTGATGATGGGAAATTT  
GGGAGCCGTGTCAGTTTGTAGTGGCCTCTGGTCTAACAGCTGTGATGACTAATAGTTTGCAG  
TTCTCTGTAAATTCTACCTCTACTACCCATCCTGCTTCCATCACTGTAGCTGCTGCTGCC  
AAAGGCCCTTTCTTCTCCTGAGGACCTATTGAAATACAAGGGTGAAGTTGGATGGAAG  
GGATCTGCTGCCACGAGTGCATTTCAACCTGCTGAGCCCCGAAAGCTTTTGAAATGCCT  
CTGGGTCCTAGTTGGTCTGCCCCTGATGCCTCTGCCAGTAAACATAACCGTATTTCAATTG  
GATATTGATCTGAATGTGCCTGATGAAGGAGTTGTTGAGGAAATGGTCTCACGAGATTCT  
GCTTCAGCCATTTACTTGGCAACTCATTATCAAGTACTTCTGCAGCACTGCTGAATGAG  
CGGTCCAATTTTATGCCTTCTGCTGTATGATCTTGATTGTAACAGGCTAGATGAAACG  
AATGACATTGGGCTCTACTACACCAGGAGCAATCAAAACGGAGTTGGACCAAATGATTTA  
CATATTCGGAAGGATTTGATCTCAATAGTGGGCTGTAGTTGATGATGCTAGCATTGAC  
CAAATTCAGTTAAACAACCTAGTCAACGGAGGTGTAAACATCGCATCTTCTCCTGCGAGGC

ATTAGAATGAGCAGTGTAGGGTTGAGCAGTTTCTCATCTTGGAATCATCCAGGGAGTGCA  
TACTCTACAATAACAATCCCATCAATGTTACCTGATCGAGCTGAGCAGCCCTTCCCAGTG  
TTCCACCTGGTGGATCCCAACGAATATATGACTCCGCGAATGTTACCCCATTTAATCCG  
GATGTGTTCCGAGGATCAGTCTTGTATCATCCCTGCTGCTGTTCCTTTTGCATCCAGT  
CCTTTCCAATTCCCCGTCGTTCTCTCGGAACTAGTTACCCTCTCCCTGCAGCCACTTTT  
CCTGTTGGAGCTACCTCATATTCAGACTCCTCACCTGGTGTAAAGAATCTTGCACCAAGA  
GTGAATTCGAAGTACCTGGGTCCCATTTGGCTCTTTGTCACCCCAATTTTAGAGGCCATAG  
GTGGTCTTCCCGACATCAGCAAAAATGGTGGGTGGATAGAAACA

>Unigene34396

GAGAAGGAAACGTCGAGCCGCAAACGTCGGGAATCCGACTCGCATCGCGATAGGGAAGCG  
TCTAGAGACCACCACCACCACCACCACCGCTCCTCCAGGCACGACGACGAACGCCATAGA  
TCTGATGAACACCACCGCCGCCGTTCCGATTCCAGAGCTGAAAGAGAGGGAAGTCGAGAT  
CGGGATACGCGTCGCGAGCGCGAGAGATCGCAATCGGTTGAGAGAAAGAAGAGGAAGGAG  
AGAGGTGATAGTGAGGAAGAGGGGCGATAAGAGAGCTAGGGTTAATAATGGAAATGAGAAA  
CGTAGATTTGAGGAT

>Unigene20980

GGATACCAATACCTAGTCAACCACTTCCTCGTCTTCTCCTCCTTCCCATCATCATCATC  
ATCATCATCGAAGCCCTCCGAACCACCCCGAAGACCTCCTCCACCTCTACAACTCCATG  
AAAACTTCACCTTCATCCAATCATCACTTCTTCTTCTCCTCATATATGTCTTAACA  
ATATTCTCCTCTCCAGACCCCGACCGGTCTACCTCGTCGACTACGCTCTCTTCAAACCG  
CCGCGCAGCCTCCGTGTCTCCTTCGCCGGATTTCATGGAGCACGCCAGGGTCGCCCTGTCC  
AACTACCCGAAAAGCGTCCACTTCAGATGAAGATTCTAGAACGTTCTGGATTGGGAGAA  
GAAACCTGCCTCCCTCCGGCTATACATTACATCCCTCCGACACCAAACATGGAACCTCGCT  
AGAGAGGAAGCCGAGCTCGTGATTTTCTCTTGATGGATTCTCTGTTTAAGAAAAGTGGT  
CTGAACCCTAAAGATGTCGATATATTGATCCTGAATTGTAGTCTTCTCTCCGACACCG  
TCTCTGACGGCGATGGTGATCAATAAATACAAGATGAGAAGCAACATCAGGAGCTTCAAT  
CTTTCCGGCATGGGTTGCAGCGCCAGTTTGATTTCCATTGATTTAGGCAGAGATCTTCTC  
CAATACCACCCAACTCTAACGCTGTTGTAATCAGCACAGAAATTCTCACCCCAAATTGC  
TACCTCGGAAAGGAGAGAGCCATGCTCCTCCCAACTGCCTCTTCCGAATGGGCGGCGCC  
GCAATACTCCTCTCCAACCGCCGCGCCGATCGCCGCCGAGCCAAGTACCGCCTCGTCCAC  
GTCGTCAGAACACACAAAGGAGCAGACGACAAATCATACAACCTGCGTTTCCCAGGAAGAG  
GACGACGAAGGAAACGTCGGCATCAAACCTGAACATAGATCTGATGGCGATCGCCGGAGAA  
GCTCTGAAATCGAACATCACCACCATCGGACCTCTCGTTCTTCCGGCGTCGGAGCAGCTC  
CTCTTCGCCCTCTCTCTCATCGGAAGAAAGCTGATCAACTCCAAGTGGAAGCCCTACATT  
CCGGACTTCAAACAAGCGTTTCGAGCACTTCTGCATCCACGCCGGCGGC

>Unigene1115

GGTGCGTGTCTTAGTCTCAAAAACCAATGGCAGAACGGGTTGAGGCGGCGGAACAGCGGC  
GGCGCCACTTGGCCGGAATTTTCGTATGGTAAAAATGTTGTTAAGCTGTGGGATAGCTTA  
GGATTGAGTTTGATTTTGATGAAGATCTGTTCAATTATGATTCGGAAACCGTGTTTCT  
ACCTGGGATAATCATCGCGGATTTCCGGCGATGTTTGGAAATGTTCCGGCGGCGGCGGCG  
CGGCGGCGCCTACGGTGGTGTGTTGGCGGAGCGTAGTGTTAAAGGAGACGGCGTGATT

ATGGAGGATAAACAGTTGAATTTCAATCAACCGTTTTTATCAGTTAGACGACATGGACCA  
ACTCCAACCTCACAAAGAAGTGAGAGAAGGAAATCAACACTTCTTCCACTTCCATTCTT  
AGGCTTCCTTCTTACAGATCAGAACTGAAATCTGGTCCCATCAGAGATCCGGGGGCCATT  
CCGTTTTTATGGGAACAGTCCCCCGACAACCTAAGGAAGAGACGAAACCAAACGATCGG  
AGCTCTGATGAGCCTCCGATCGCCCCAAAGCTCCCTCCCGGGAGGTATCAGCAAGATTGT  
GGTAAATTGCTGTAGGCTGTAAAGAACCAAGTTGTTGATCTGCCTCATAGTAATGGGGAC  
GAGAGACGAGACGTTGATGTTCCAGTGACTCGCGTGCTGATCCATGTCTCGATGAGAA  
GTCGAGAGATGTAAAGAGACGATAGACGAGGAGGAGAGATCTGATTCGGAGGATAGTGAT  
GGAGCATATGTGGATGCACTGGATACTCTGTCAAGGGCTGAATCTTCTTTCTTGAAGTGC  
AGCATGAGTGGCTTAAGTGGTGTAGATGTGAAACCCCTGGAAACTTTTCGACTGAACGA  
CAAGCTCGCGAGTTCATGATGGATAGGTTCTCCCAGCAGCGAAGGCGATGGCTTCAGAG  
ACCCCTCAACATGCACCCAAGAAACAACCGTTTCTTCAAAAACAGCCACAGCAGCCAAAG  
AAGACAATAGATCAATCTAAGCCTTCATTAAGATACGGGGCCGAGCTTTCGAGACCGATAC  
ACCTATCACCATGACAACAGAAAAGGAGAAGAAGAAAGAAGAAGATAGTGATGATGAG  
TATGATCAACGTCAAATGTGCCTGCAGTATGCGGTTTATTACCTCGTTTTTGCTTGAAG  
AGTTCACTCTGCCTGTAAACCCCTGTTCTGCAATGAGTGTTAGAACCCGAGTACCATCT  
AAGAAAGTACAACATAGATCTTCACCAGCTGGTTCCTTACAGTGAGATTGATCGAAGAATG  
GTCAAAACCCAGACAGCTGAACTTGATCAAGAGAACGGGAAGCTGAGAAACAGGAGTGGT  
CATGTAGCTAGCCTTAGCACATCAACGGCATCTCTGCCATTTCTTGAAGATGAAGAAATC  
CTTCTGCTGCTGAAGAAACAACGAATGCTCGAATTCAAGGTCTTGGATCGCATGCAAG  
GGCTTCAAAACCTTTCAGGAGTTTTTGGATGATCAAGGAAGTCCAGGGGAGTCGAGCTTG  
GGAGATCCTATAATCGAGAAAACCTCTCTATATAGATACAGTACAGAAATTTTGAACCTCC

GATTTATCGTCTTGTAAGCCAAAGACAGAAGCCAGCGTTAAGGGTGTTCTAGCTTAAGG  
GAAGAAGACGAAGAAGAGATCATCACGAAAAGGATTTGTCAAACGCACGCAATAGACTCG  
TCTCTACAAGATTGAAACAGTCGACTGCAATGGA TGAGACAAGAATTTGCTGCTAAAT  
GCTGACACACTGTGTGATTCCAATGTTTTATCCTCGACTGACAAGTCAACTGTAAAACGA  
GTAAATCAAGGAATCAACCCAAGTAAGGA GAATACAGACGAAGTGACCGAACAAGGAGCA  
ACAGAGAGTTTAGAAAAACAGTTCTCTATAGAA GTTACCATGGGAAAATCTTATCAGTAT  
CACTCCGGACTTCTTGCTCCACCTCCTTTACCAA AATCTCCGTCTGATTCTTGGCTTTGG  
CGAACATTGCCCACTGTTACCACCAAAAAGCTCGTCTCTTCGTTCATACCGTGATGCAGCC  
ACAACAAATCCCGAAAATCAACTGAAGAAGGCACCTACAAGTGATATGAAGTGGGAAAAT  
ATTGTCAAAGCCTCAAAGGAAATGCTTACGACCATAACCAGAACT

>Unigene6405

ATGAAACGCCCTCTCGCTGCCGGCGACGCCCACTCCACCGTCTCCGAAACCGACGCCAAC  
AAGAAGATCAAACAACAAGATACAGAAGAAATGT CGAAAGCAGCAGAAGCCGTTCTAATG  
GACGAGAATCTGCTGTACGAGGTGCTGCGGGCGGT CGACGACGGGCGCACTCTAGCCAAG  
GCGGCGTGCGTTAGCCGGCAGTGGAGGCGCACGGCGCACGAGCGGATCTGGGAGCTG  
ATCTGCACGAGGCAGTACCACAGCAGCCGATGCAACTACGCGCCGTTGTACGAGGCTC  
GGTGGATTCCGTCGCCCTTCTCTGAGCCACCTATGGCCGCTACTGAAGCCGTCGTCTCA  
GCGCCGCCTTCGGTTTCCACGTGGCATTCACTTCCTCCGTCGCCGCCGCCGCCGCCGCCG  
CCAGCGAATACTAAGGCGCGGTGGGGAAAGGATGAGGTGAATCTTTCGCTTTCGTTGCTC  
TCAATTAGGTACTTTGAGAAGATGAGTTTCAATAAGCGAAGCAAA

>Unigene37860

ATGGTGGAGATGGAAGGCGGTCCTTCCTCCAAACAGACGCCGCCGCCGCCGCCGCCGCCA  
ATCACCGATATGTTCCAGAAGTTTGCTCTTGCTTTCAGGACCAAAACCTACGAGCTCTTC  
ACCGAAGATGCCGCCGCCGACTCCGATGGTGACGTCACCTTCTTCTCGACTCCGCCGAG  
GAGTTCATCCCCGACCAGAAAGTTGTCGTTCTTAAACCCGACTCCATTTACGCCCGGGAT  
AGTTCAGATGCGCAATTAATCGGAGCTTTGATCCCTTCTCTCTTTGCCACTCTCTCCTCT  
TTTGAAGCTACCTACCTACAATTTCAAGCGGCCCATGTGCCGGAAGTTGACCCCACTGCC  
CTCGAACAGGCCGATAAGTCGATCGTCTCAATTCTACAGAACTGAATGAGATGAAGAAA  
TTATACAGGGATTCTGAAGAGAATGAGCTTAGGTTTAAATTGTGGTTTTGAGTTTCCTGCA  
GCGTCGTTTTTTGGAATTCCAAGTGCAGGAGAATCAGAGCAAGCTTAGGGTTTTGGAGACG  
ATTGTGAATTCCTTGCAATCTCAAATTGATGTTAAGGATGACGAATCAAGGGATTTGCGG  
AGAAAATTGGAGAAAATCCGAGCTGTAAATGCTGATTTAGCGCGGAAATTGGGCATCAAA  
GAGGCAAATAAAGGTTTGGGGA TTGAAGTCTTGCTGACAATTCGGGTTTTCGAAGCCATG  
TTAGGCGATTCAAGTCAAGTCACTGCGTTGCTTCGTGAAGCTGCTGATTGATTTGATGCAA  
AGAGCAGGGTGGGATTTGGAGGAAGCAGCTAATTCTGTTTATTACAGGAGTTGATTACGCC  
AAAAAGGGTCATTTCCGGTATGCATTTCTATCTTATGTCTGCTTGGGAATGTTTCAAAT  
TTTGATAAGCATGATTTTGGGTTAAGCAATTCTGAAATTATCTGCAATGGTAATGGGATT  
AAACATGGTGAAAATGGTGAAATTGATAGTGACAATGATGGTTATCTGAGGCAGTTAGTA  
GAGCATGTTGCGAGCAATCCTATGGAGATTCTAGCTAAGAATCCAAAGTGTGGGTTTTCC  
CTTTTCTGTGGGAGGAAGTATGAAGAACTTATTCATCCCACAATGGAGTCATCTATTTTC  
AGCAATTTAGATAGGAAGGAGACTGTGTTGGATTCTTGGAAAGTCATTGACTGTGTTTTAT  
GAGTCATTTGTTAGGATGGCAAGCTCAATATGGTTGCTTCATAAGCTGGCATATTCAATT

AACCCTGTGGTTGAGATTTTCAAGTGGAGAGAGGGGTCGAATTTTCGTTGGTTTACATG  
GAGGATGTTTTGGGTAGATGTGGTTTGCTCGGAAAAGCTAGACCAAGAGTTGGGTTACACA  
GTTGTGCCTGGATTTAAAGTTGGAAGAACTGTTGTTCAATCACAGGTTTATCTCACTAAC  
TTAAAACCTGTGGAG

>Unigene33864

ATGTCAAATTTGACTTGTGCATCTGGTGAA GCTAGTGGCTCTTCTGTCAACAGAAATGAT  
AATAATGGTGGTATGAATATCTATCCAACCTCACTCAAGAAGAAAAGAAATCAACCAGGC  
CATCCAGACCCTGGTGCTGAAGTGATAGCATTATCACCAAGATCCCTTTTGCCACCAAC  
AGATTTGTGTGTGAAGTGTGTAACAAAGGGTTTCAAAGAGACCAAAATCTCCAACCTCAC  
AGAAGAGGCCACAATCTCCCATGGAAATTGAAGCAGAGAACAAGCAAAGAAGTGAGAAAG  
AAAGTGTATATCTGCCCAGAAGTTAGCTGTGTTTCATCATGATCCATCAAGGGCACTGGGA  
GATCTCACTGGAATCAAGAAACACTTCTACAGAAAACATGGTGAAAAGAAGTGGAAGTGT  
GAGAAATGCTCCAAGAAATATGCAGTTCAGTCTGATTGGAAAGCCCACTCTAAAATCTGT  
GGAACAAGGGAATACAGATGCGACTGTGGAAGTGTTCCTTCAAGGAGGGATAGTTTCATA  
ACACACAGAGCCTTCTGTGATGCTCTAGCACAAAGAGAA TGCAAGATCAATCACCAGAAAC  
AATATCCCTCTACAAAATTCATCAACAACATCTCTCCAATCCCAATTCAATAATGTTTCA  
CAATTTCCAATAAAGAAAAGAGCAGCAAAACTTCACTACTCCACCATGGCTAAGCTGCTCA  
CCAATCATTGGACCACCCCCACCCACACATTGATCTCACCACCCCATCATCATTAAATC  
TTTCAAGATCATTTCCCTCACAACCATCAAGATCCAAACCCTAACCCCTAGCTTCCACCAC  
CCACCACCCCATCACCTACTTCTCAGCCACAGCACTGCTACAGAAGGCAGCCAGATG  
GGATCAAAATCCAGCAACACCACCCACATTTCCCATCACACAGCGGTGGTGTGTTTATG  
AGGGCCCAACACAACCAATCTCCTCACGTGTCTGCCTCAACAACCTGATTTTGGTACC  
TCACGTGATGATTTTCATCCATGGCTTGTCTTCATATGGGAATAAAGCTGCTGCTGCTGCT  
GCTGCTGCAGTGACAGGTGCAACCTTAGGTGGCAATAGCAGCACCACCCACCTTCTTCT  
CCCCCTCTCAATATCCATGAAATGATGATGATCAACAATGCTGGTGGATTGATTGAAGCT  
GCCTCAGCCTTTGATGAAATTACATTTGCTGAAATGCTGAATAATAATTCAAAGAATGCA  
AGTGGTGGTCAGTTTAGCAGCAGCACCACAAGTCATGAAGGAGGAGAAAACATGACAAGG  
GATTTCTTGGGATTAAGGCCTTTGTCTCAAACCTGAGATCCTAAGTATGAGTGCTTTTGAT  
AACTGCATCAACGCTAATTCCTCTTGTAAATCATAAT

>Unigene48244

ATGGACAGAAATAGAGATGGGAGAAGAGCAAGCATTGTTGGCTCTAATGGCTTCAACAGA  
AGAAGACATCGGACGAACAGTCTCAGAGACTCACCAGATGAAGATGGCGGACAGGAGTTG  
CAGGAATCCGTGAGGTTAAGAGATAGAGCGAAGAAAGATCGAGATCGAGACAGGGATAGA  
GATAGAGAGAGGGAGAGAGACAGAGAGAGGGGAAAGGGAGAGAGAGAGAGATTTGAGAGAG  
AGGCCGAGCAGGAGTAAGAGAAGAAGAGGAGAGAGATTAACCAGAGATGATATTGGAGGA  
GATGATACTTCAGAAAGAGAGTGTCAACGATGAGGAGGATGAAGAAGACGAAGATAACCCC  
TCCGCCTCCGCCGCCGCCGCCACCGCCACCGCCACCGCTGGGACAAGGTTGATGACGCCG  
CCGGTTCACCACCACCACCATGGCCATCTCAGCAACCACCACCACAACCATAGCAGTAGT  
TTTAGTCAACAACAACAACAGCAACACAATAGCAATAGTACTAGCAATATTGTAAGTAGT  
AATCACCATCTTCAACATAGGAAAACCTTCCCTCCCTCTTCTGCAAAAGTCTTGCGAGCG  
CCGCCGGTGTGGAAATCCGGCGACGAAATGATCGGCGTCTCCGTTCCAAGAAAAGCTCGT  
TCAGCGTCTACAAAGAGGTCGCACGATTGGATTCAAGCAGTAGTAACAACAACAGCGGC

GGTGGAGTTTCCGGCGAACAGAATCTCGGGCAAGCCACGTGTTCTCCGGCGAGACAAGGC  
GGCGTTTCAACGGCGACGCCTTCTCCAGCTGCTCCTGTATCTCCATCCACTTCCAATGCT  
TCAATGAAAAAGAGCTCAAGCCGAGCGTCAACCACTCCGGGCCGAAGCTGAAGCCGCCG  
AAGGTCTCATCGAAGCCGAGTTCTTCAATCCGGAAGAACTGGAGATTGAAATTGCGGAG  
GTGTTGTATGGATTGATGACTCAATCTCAAGCTCCATCGAAGAAAGAGGAATCGAGAGAA  
ATCAATCGATTGAATAACGATGCCAAATCGCGTAATTCATCGCCGATTTCTAATTCTACT  
TCGTCAAATAATCTCAATTTGGGACCCAATTCGAGTCCCCTTTCAGCTGTCGCTCCGAAG  
AGAAAGAGGCCGAGGCAAGTGCTGGAGAATTCGAGCTTCGGCCACCGGAGTAGCTCCGTT  
TCGGTGAAACCGGATGCAGATCAGGCGCCGAAGAGTGAGACTCAGTCTCACAACCTGGAT  
AAAATCTCCGGATCCGTGCTGAAAATGGTTACGGAATGGGGGGTAATTCGGTCAACCTA  
CAAGAACAACAGGCTGACCCACCGGCACCGACACCGGCACAGGCACCGGACACTGACACCT  
ACACCGCCGGAATCGATGAAATCGGATTCGGAATTGCATCCTGTAGCTGATGAATCGAAG  
GAGAGAAAAGATTTGGTAGCGAAGGAAGAAGCGAGCTCACCCAAGGAGAAGGAATCCGCT  
GTTGTTAGAGCAGAAGATAGCATCAATGACGATTCACCATCGACAGCGACCGCTTCATCG  
ATTCCAACGACAATTAAGCGAGCTCCATCGGTGCTGAGATTGAGAAACAGAAAGGAAGAA  
AAGTTCGAAATAGATCTGATGGCGCCGCCGCTCAAGTTCGATCATCTCCGGAGAGGGGAA  
ACGAAGATTGATTTTAGGAATCCATCATCGCTGGATCAAAGCCATCTTTACCGAATGTT  
GATTCAAATTCATCCAAGGTCAAAAATCAGGAAGGTGAGAACTGAAGAGTGCAAGTGGG  
AAAGAGCATTCAATAATGCAGAAAGGAAAGGTAGAGTTTCAGGAGAAGAAAGTGATTCA  
CACAAAGCAATCGAGAAGAAACCGAGGAACGTTGATTTACATCTCGATTTGGAGAAGTGC  
GACGGCGGCGATGCGGCCGGAACACAAAGTCACAGTTGCAGAGTCAAAGCAACATAAG  
CAACAAATGCCATTTTCTGAGAAATCTGGCCATTGACGAATTCATTGCCTTTGCCAATG  
TCAATGGCTGGTTGGCCTGGTGGGCTTCTCCCATGGGATACATGGCCCCGTTGCAGGGT  
GTCGTTTCGATGGACGGAGGCTCCGTTGCACCGGGGCCATATTCAGTCGTTGTTCTCACAG  
CCTCGTCCGAAGAGGTGCGCTACGCATTGCCACATTGCTCGTAACATACTACCTGCAG  
CAGTTCATGAAGATGAACAACCCTTCTGGCCCCCGCCTGCCAGTTCTGCCACCCTGTT  
GGTTCGAAACCTTGCAATCTGAACGCCGTGCCAGCCGAGATATTAGAGGTGTTGGCAAT  
TCGCAGGATAAGGGGCAGAGCGTTGCTGCAGTTTCTAATCACGGTGGGAAGGATAAAGGC  
TCTCAATCGAACAATTCTAATCCTGATGCTGCTGCTCAGAGAAAGCAGCAGATTCTAATC  
CAGCAAGCAATGCCTCCTAGTAATTTGCTTGGGCCTGCTTTATCTTCCCTTTAAACCAG  
CAACAGTCTGCTGTAGCACCTCGGCCTAGCGGTAATGCCAAGTCTCCGACTGTTGGGCCT  
TCCCCGAACGCCCCCACTGCTGCGGTGACCAGCACTTCATCAGCAGCAACGATGAGCTTC  
AACTATCCTAATATTTGCAATGAAACGCAGTATTTGGCGATCTTGCAAGCAATGCTTAC  
CCGTTCCCCATGACGGCTGTAGGGGCGCCACCTAATTTAGGGGCAATCCGGCTCAGGCA  
ATGCCTTTGTTCAATGGCTCCTTCTATTGCTCCAGATGATTATCCGTCGCAGATTGAG  
CACCATCAACCGCCGTCTGCTCAGTTGATGCAAGCTCACCCGAATGCAAGTTCGTCTAGT  
GGATCCTCTTCGTCTCAGAAGCATTGTCAGGGGCCAGAAAAGTCAAGTGGCGGCGGTGTT  
TCCGGTGGTTCTGGAAGTGAGGGTTGCAGAGCTTCTCGGCCAGAAAAGCTCAGCCACCT  
CAGCAGTTATCCATAATCAGTATGGGCATCCGCAGCGACCGAGGCATCTAGAGGGCGAG  
CCGGGTAGTGAAGACGGTCCACCCTCGACTGACAGTGCAGGGTCTAGAGCCACGATGAAC  
ATTTATGGTCAGAACTTTTCGATGCCATCCACCCGAGAAATTCGCGTTGATGGCCTCG  
CCGGCTGCTCTGGCTGGCGCTGCTGCTGCTTCGGCTACTGCGACGAGTGCCAGTAGTAAT  
CATCAAATTGACAAGAAAGCCATCAGTCGCAGCAGCAGCAGCAGCAGCAGGGAGTGAAG  
AATGGTTCAGAATCTTTGCCCCACATGGATTTGCAATGTCCTTTGGTACCATCAATGGA

GCTACAACCTGGCCAAGGGATGGATATGGCATCCATGGCTCAAACCATGCTATATTCCAG  
AGCTCCTCCGAAGCAGCCGCCCCGGCAGAACATCCAGATGATGGCTGCAGCTCAGGCTGCA  
CAGAAGAAGAGTTTCCGAATGTCTGATGATGGTAAATTGGGAGGC GTTGATTCTGCCACC  
GGAGACGATGAAAGAAAAAGCATGGCTGGGAAGGCCCTAGGTGGTGGAGGTGGACAATCC  
ATTGCTTTTACTAGGCAAGATTTGGGTGATGGATCTGTTGCTTCCATTTCAGGCAAACAGT  
GTGATTGAGAGCTCTGCTCGATCTCTAAACGTCGCATCTGGAGGCGCCCGGACCTCTCGA  
TCCATGACAACGAATGCTGTGGGAGCTATCAGTAATGTTCAAGCTCAAATTCATCAGCAA  
CAGCATCAGCAGATGCTGCAACTTAAACAGCATCAGCAGCATCAGCATCAGCAGCAGCAA  
CAACTGGCGGCTGCAAATCGGAGCAAGGGGCCTGTGGCTAGCACCGGGAGTATGTACACC  
GAACATCTGAATTCATCGTCTGCCATGGCTGCCAAGTTCCCAAACACACTCTCTGGCTTC  
CCACAGAACCTTGTCCAGAACAACAGCAACAGCCCAAGTCAATCCCCGAGTGGAAGGAGC  
TCGTGCGGAGCGCCTACGCCTCAAACACCGTCGTCTCTGGTCTCATCAACCACGACGACC  
CTTAAAGCCTTCAACAACAGCACACTCGAAGCCAACCAAAATGCATACTCAGATATCC  
TTTGGAGGAAATCAGAAGCCAGCTACTGCCTCACAAGGGCAGGCGCCACCGAGTACCAAC  
CAGACGCCGTCGTCCCCCATGATGGTTGGCTCTCCCACGACGTCTTCCATCTCCAAAGGA  
GCAGGTGGGAGCCCAAGAACAACTTCATCAGCTTCCACGAACAACAAAATGAGCCAAGCT  
TCGTGCTTGTGAGCAGCCGCGGAAGAACTCATCTCTGTTCTTAACCAGAAGTCTCCA  
TCAATCCTTGGAACCCCTCACATGGCTTCTTCTCCCCCAACAATGGACCGAAAGCTCAA  
ATGCAGCAACAATCACAGCAGCAGCTCCCGAAAACAATGCAACAGGCACAGCTGTTCTTC  
TCAAACCCATATGCCCAAAGCCAGCCTCCTCATCCTTCCACTACAAGTTCAACAACATCT  
GGCCCGAGCGGATATTATATGCCACGAAGACGGCCGGAACAACACCAGCAGGGACTGGGT  
GGTCCGGTGACATCCACCGGAGGGTTAACTGTGCCCTATTGTTAACTGGGGAGCACA  
AACACGAACGATCCAGCTACAGCAATTGCAGCAGCTACTGCTAATGTGAAGGGTGGTGGA  
TTATCCTCACAGGTATAATTTCATGCCACTCAATTTGCTGCACAATCTGGTGGAACCAT  
TTACCAGCTGGTTTCTTATATGCATCCCATTCCAGCTGCTGTTAGGTGAAACCTGCA  
GAGCAGAACTACCTGCTGGAGATGACAATTTACATCCATGGCAGCCTGAGAAGAAG

>Unigene92831

ATGGATGAAGATAGCCTGAGGAATTGGGGTACTATGAACCTCCCCTCAAGGGGCATCTC  
GGTCTCCAGCTCATGTCTTCTCTGGCAGAGCGAGACACGAAACCTTTCCTAACCGGACGA  
GACAATCCGGTTATGGTTTCAGCCAACGGGGCCTTCCATCCCAGGGATTGTGTGGTTACT  
GAGCCACCAGTCACTCATATGGACTATGTAAGAGATAGTTGGATTAATCATAGGGAGAAG  
TTCTTGATATGTTCCCTGGAAACCTTATAACCCTGTTATTCCCGAGTCGTCCGCCTCC  
CGCCACCCTATCCAGATGTTGCAGCAGCAGCAGCAGCAGCAGCCGGATACGACCAAAGAG  
ACCAGGCCTAGCATGGAAGAACCAGTTGTTAAGAAGGAGAACCCCCCTACCAAGAAGAGG  
GGTGCTGCTACGACCCCAAAAACCTCCAAAGGCGAAGAAGCCTAGGAAAGTAACCGAGCCA  
AAGGAAAATGGTAGCAATCCATCAGTTCAACGTGCGAAAACAGCGAAAAAGAATGTGGAG  
GTTGTTATAAATGGGATTGATATGGACATCACTGGGATCCCAATCCCTGTTTGTCTTGC  
ACCGGCACTCCACAGCAGTGTTACAGATGGGGCTGTGGGGGCTGGCAATCGGCATGCTGC  
ACCACCACCATATCAATGTACCCATTGCCAATGAGCACGAAGAGACGTGGGGCTAGAATC  
GCAGGTCGAAAGATGAGCCAGGGC GCGTTCAAGAAAGGTGTTGGAAAACTCGCCTCCGAA  
GGGTATAACTTCGCTAACCCCATCGATCTGAAGACTTATTGGGCTAAGCATGGCACCAAC  
AAGTTCGTGATAATCAGA

>Unigene37802

GAAGAGCTGGACTGTGTGGGTACTGGTTTGGGCGTTGAGTGCGCGGTGAGTCCTGCTGAT  
GATTCGTCGATTAACTTGAAGAAGAAGAAGAAGAAGGTGAGAAATCGGAGATATGG  
AGGTTGGATTTAGTTCAATTGGCAGGGTTTGCTTTAGAGTGGGGGGTTTTGATAGCGCCC  
TTCTTCTTCTGGGGCACCGGCATGGTGGCGATGAAGCAGGTTCTACCCAAAACCGGCCCT  
CTCTTCGTGGCGGCGTCTTGCTGATTTTGGTGGGT

>Unigene49168

ATGGCCAGAAAACGAAAATCACGCGCCGCTCTGGAACCCGAAGTCGTACAGCAAGCTGAG  
CCCGAGCCCGAGCCCGAGCCCAACAAGAGCCTGAGCCAGAGCCTGAGCCTGAGCCCGAG  
CCAGAACAACAATCCGTGAAAACCGAGCAAACCACTGAAGGAGGTGAGGAAGAAGAAAGTG  
GTTGAAATCGAAGAGGAGGAAGAGGTGGGAGAGGGCGAGGAAGAGGGAGAGGGAGAAGAG  
GAGCAGCCGGATACTATGGAGGAGGAGGAGGAGGAGGATGAGGAGGAAGACGAGGAGCAA  
AAAGATGACGATGTTGCCACCGACGCAGAGAACGAGAAAGGGTTGAAATCGCCGGGAAC  
CCGTCTGAGAATGCTGTCTCAGAAAATGGCGGTGAAGCTGAAGGGCGGGGCGAGGAAGGG  
GAAGATGATTTAGATGAAGAACCGATCGAGAAGCTCCTCGAACCATTTTCTAAAGACCAA  
TAACTCTTTTGTATCAAAGCAGCTGTTGCTAAACACCCGGATCTAGTTGAGAACGTGCAC  
AAATTGGCAGATGCCGACCCCGCACACTGCAAGATATTCGTGCACGGCCTCGGTTGGGAG  
GCGAATACCGAGACAATTACCTCTGTGTTTGGGAAGTACGGAGAGATTGAGGATTGTAAG  
GTGGTGAGAGACAAAACTCTGGAAAATCTAAGGGTTATGGCTTTATTTGTTCAAGCAC  
CGTAATGGGGCACGTCGCGCTCTGAAGGAGCCTCAGAAGCTGATAGAAGGTCGGATGACT  
TCATGCCAGCTGGCCTCAGCTGGGCCAGTTCAGTCGCCTGCCCCGACTGCAGCACCCGCT  
GTTTCTGTACCACCTGCATCAGAGTACACACAGAGGAAGATTTATGTGAGCAATGTATCT  
GCAGAACTCGATCCAAAGAACTTTATGATTACTTCTCCAAATTTGGGGAGATTGAGGAA  
GGGCCTTTAGGGTTGGATAAGCAGACAGGTAAACCTCGAGGTTTCTGTCTGTTCTGTGTAC  
AAGAGTCTCGAGAGCGCAAAGAAGGCACTGGAGGAGCCACACAAAAATTTGAAGGTCAA  
ATGCTGCACTGTCAGAAAGGCAATAGATGGCCCGAAGCACAGTAAGGGTCACTTTAACCAG  
CAGCATGGTCAGCAGCAACAGCAACCTCATCAACATCATCATCAGGGGCACCAAGGGTAT  
TACCACCATCCGGCCAAGAAGGGGAGGTATTCTGGAAGTGGAGTAGGGCACACTGGTGGA  
CATTTGATGGCTCCAAGTGCTGGACCAGCTGTTCCCTCAGTAGGGTATAATGCCCTGCA  
GCTTTAGGACAGGCTGTGGCAGCGTTGTTGGCCACTCAGGGGGCGGGTTTGGGTATTGGA  
AACATACTTGAGGGATTGGAGCAGGAGTGAATCCACAGGGAGTACCACCCATGATGAAC  
AATGCAGGTTACGGAGGTGAGGGTGTGGTGGTGGATATGGAGGTCAACCGGCAATGCAG  
GGAGGTTATGCAGGCCAGCCGAGATCAGTCAAGGTGGTGTCCGGCCACATCAGGGTGGG  
GCCCCCTACATGGGCCATGGTCACTAGATTCTTCATAAATGCATCAAACTTTTAGTTTT  
GGACTGGTGATTCTTCTGAAGTTC

>Unigene33516

AAATTAAATTCAAAGCCAGCAATGGGTCAGTGTTACTCTGGACCATCAACACACAAGGAC  
GATCAAGAATCTCCACCACCATCGTCGTCGTCGTCGTCGTCGAGGAGCTTGAAAGATAGA  
TGTGCTGCGGTGGCGAAGGAGAAGCGATCAAGGCTTTACATCATGAGGAGATGCATCTTC  
ATGCTCATCTGCTGGCACAAGTACGATGATTCC

>Unigene62496

AGCGACTCTTCTACTTCTACATTCAACATCGACGCCCTCGATCACGCCGAATTCGAGGTC  
CAAGTTAACTCGGGGAAGAAAAAGCAGAGAGTGGAATATGTTTTGCCCGTTGGATTTCTT  
GATCCAACCAGCCCCGTTTCGAGGGTTTCGGTGAAAGAAAGAGAGGGTTGATGATGCCAAA  
CGTTCAGAAAATTCGAAACAGGACACGATTACTACGTTCACTCTGCCGCCGAGTTGCAA  
CAGTTTTGGAAAGCCGGTGATTATGAGGGCGGC GGCGGCGGCGGCGACAAGTTTTCCGAT  
GATGACATGGATCATCTGAGGGTTCATCCAAAATTCTTGCATTCAAATGCC

>Unigene56323

CCTCCCCAAAAAAGTCAAATGCCACCACCACGACCGCCGCCGCCGCCGCCGTACCT  
ACACCACAATCCCAATCTCAGGCGTCGACGTCATTTCCCGATCCACGCAGAACCTATCCG  
CCTGTCTCTCCCGCTGCCGTCCCTGGCCGGAGTTCTTCTCCACCACCTCCCTGCTCGATT  
TCCCCCTCCTCCT

>Unigene40899

CATCTCCGCCCCCGACCCTCCTCCCAACTCCGCCCCCTCAATTCCCATTCTCCTCCTCC  
TCCTCCACCCTCACTCTCCGCAACCCCTCAACCTCTCTCTCTCCCCAAAAACCCACAGA  
AGACTCATCGTCTCTGCCGCCGCCGCCGCCGACTCCGCCCCCGTGAATCCCAACAGCCG  
TCTCCTGCTCCTGCTCTACAAGGCGCCAAACCCATCCCCCTTATCATCTCAATTGCCGTC  
GGCGTCGTCGTCCGCTTCTTC GTTCCGAAACCCCCCGAAGTCACGCCTCAGGCGTGGCAG  
CTGCTCTCCATTTTCTCTCCACCATCACCGGACTCGTGCTCAACCCCCCTCCCCGTGGT  
GCCTGGGCCTTCATCGGCCTCACCACTCCGTA CTACTAGAACACTCCCCTTCACCTCC  
GCCTTCTCTGCCTTCACCAATGAAGTCATCTGGCT GATTGTTATTTCTTTTTCTTTGCC  
CGTGGGTTCTGAAAAACGGCTTGGGGGATCGAATTGCCACCTATTTGTGAAGTGGTTG  
GGAAAGAGGACTCTCGGATTATCTTACGGTTTGGCTTTGAGTGAAGCCTTGATTGCGCCG  
GCAATGCCTAGCACCAACCGCGAGGGCGGGTGGTGTCTTCACTCCTATTATTAAATCCTTG  
TCGTTGTCAGCTGGGAGTAAACCAGGGGAGCCCTCTAAGAAGAAGCTTGGATCGTATTTA  
GTGCTTTCCAGTTTCAGTGTGCTTGTAACCTAGTGGACTTTTCCTAACTGCTGCAGCT  
CAAAACCTGCTATGTCTCAAGCTAGCCGAGGGGCTTGGGGTGGTAATTTCAAACCCATGG  
GTAACCTGGTTCAAGGTTGCAAGTTTACCTGCATTAGTCTCTCTTTTAGTAACACCGTTG  
GTCTTGTAACAAGCTTTATCCTCCTGAGTTAAAAAATACTCCTGATGCACCTGCAATGGC G  
GAAAAGAAATTGGAGGCCATGGGTGGTGTGACAAAAAATGAATGGGTTATGATTGCTACC  
ATGCTTCTTGCAGTTTCTTTGTGGATTTTTGGAGACGCTCTTGGCATTGCAAGTGTGTT  
GCCGCTATGCTCGGGCTATCAATACTCTTACTGCTGGGAGTGCTTGATTGGGATGACTGC  
TTAAGTGAGAAATCAGCATGGGATACATTGGCATGGTTTGCAATTCTTGTGGGCATGGCT  
GGCCAGTTGTCAGATCTTGGCATTGTAAATTGGATGGCTGGTTGTGTAGCCAAAACACTC  
CAATCGTTGTCATTGAGCTGGCCGGCTGCTTTTGGCATTCTTCAAGCAGCTTACTTCTTT  
ATCCACTACCTATTTGCTAGTCAAACAGGCCATGTCGGGGCATTGTTTTCTGCATTTCTT  
GCCATGCATTTGGCATCCGGAGTTCCAGGTGTGCTAGCAGCATTGGCTCTCGCTTACAAT  
ACTAACTTATTCGGATCTTTGACACATTATAGCAGTGGTCAGGCTGCTGTATATTATGGA  
GCTGGTTATGTAGATCTTCCAGATA TTTTCAAGTTCGGATTCTCATCGCTGTCTTAAT  
GCAGTGATCTGGGGTGTGTTGGGGGATTTGGTGAAGTTCTTGGGGCTGTAT

>Unigene33712

ATCAACGGTCCAGATCTCCTCCTCCGTTTCTGGCTCTCCGTTTATCTTCCCAACCTCCCC

CCTCTCTCCTTCCCCCCAAACCCCCACCCCCTCTCTCTCTCCTCTGCAACTCGATT  
TTATATACATACTGATACGAGTAGAAGGAAGCTCTCTCTGAGGGGGTGTGTGTGTGAGAG  
AGAGAGAGTAGAGAGATGATGTTGGGAAAGAGATCGCGTCCTCCGATGAAGAGAACTACG  
AGCATGACGGAGTTCACCTTGATCTCAACGGCGGCGCTTCTAGAACCGTCTACCAGCCG  
TCGGATCCCCACAATCCTTTCAACGGCGGAGCGGTGGATCAACGGTACCTGGCCTCCGCC  
TCCTCCGCCGCTCTCCTCGTCCGCAGCGGCGCGCTCGTCGGACTTCGTGAAACTGCT  
CATTTCTCAGAGTCTGTTTCCTCTGAAACGCCGTCTCATTCCAGGGCACGATATCTAC  
ATGTACAGAGGTGACAGTGCTTTCTGCAGTCTAGAATGTAGACATCAGCAGATGACTCAA  
GATGAGAGAAAAGAGAA GTGTTCCATGGCGGCGTCGAAGAAGGAAGTTGCCAGCGCCGCC  
GCAGCCGGAACCAAAGTCTCCGCCGCCGGAGAGACGGTTTCCGCCGTG

>Unigene453

ATGAGTAAAGAAGAGTTTTTGAAGATCCAGACTTGTGTTCTTAAAGTCAATATTCAGTGT  
GATGGTTGTAAGCATAAAGTGAAGAAAATCTTGCAGAAGATTGAGGGTGTGTACACAAC  
AAGATAGATTCAGAGCAAGGGAAGGTCACAGTTTCTGGGAATGTTGACTCAGCCACTCTG  
ATAAAGAAGCTCATCAAGAATGGCAAACATGCTGAGGTGTGGGGTGCAGCTCCAAAGGGA  
AACACAATCACAATCAGTTCAAGAATCTCCAAATTGACAATGGCAAAGGTGGTGGTAAC  
AAGGGGCAACAACAACCCCAAGGGGGGTGGTAATAACCAGCAGAAGGGGGGTGGGGGA  
GGTCAGTGGCAGGGTCAGGGTCAGAATCCACATCAGCAACTTCAACAGATGAAAGGGTTT  
CATCAAGATCTGAAAATGATCCCACCTCAGTTCATGAAGGACATGAAAATGCCCCCAAT  
GGCAACAATGCCAAGTCTGTGAAGTTCAAGTTGGAAGATGAAGATATGAGTGATGATGAG  
CTTGATGATTATGATGACGACGATGATTATTTTATGATGATGATGATGAGTTGATGATGAT  
TTGGATGATGCTCCTCTGAATAAGATGAAGGGCATGATGGGTAATGGCCATGGTGGTGGT  
GGTGGAGGTCAGCAGATGATGGCCAAGATGATGATGCCAAATATGATGAATGGTCATCAG  
CTTCAGGGGATGAAGCAGGGTGGGAATGGCGGCGGTGGTGGTGCCGGAAATGGGCAGAAG  
GGCGGCGGAGGAAATGGTGGAGGCAATGCGCAGCAGAAAGGAGGAAATGGTGGTGGTAGC  
AAACCTGTTGATGAATCATGGTGGTGGTGGTGGTGGGAACAACAATGGCAAGAAAGGT  
GGAAATCAGAACCAAAATCAAGGTGGTGGAAAGGTGGTAAGAACAATAACGGTGGACAG  
AATGGTGGCGGAGGAAGTGGTGGTGGAGCTGGCAACGGCCACAATTTTAAATGCAAATGGG  
GCCAAGAAAGTAAGTGAATGAATGATGGAGGTCATGGCATGCCTAACATGATGGGTATG  
AATGGTGGTAGTGTGGGCCATATGGGGAACATGCCAATGGGGCAAATGAGTAATCTTGCA  
GCCGTACAAGGCTTACCGGCAACCACCATGGGCGGTGGTGCCGGTGGTGGCGCAGGCTAC  
TTCCCGGGCGGGGGTCTGATCCCCACGTGCCCGGAACCCCTACTATCAGCAGCAACTT  
GCAGCTATGATGATGAATCAGCAACGAGCTCAAGGAAATGAGAGGTTTCAGCCGATGATG  
TACGCCCCGCCACCAACCGCCGTTAATTACATGCCGCTTATCCTCCATACCCGTACCCT  
CCTCCACCCGGAGAACGAGCCGATCAGTATGCCATGTTTGTGATGAAAACACCTCTAGT  
TGTAATGTGATG

>Unigene48535

ATGCCAACCCTTTTGTGAGAATTTCTTTCTTACAAGCTATTGAACGCAGTTCTACTG  
TACTTGGTACCTAAGAAGTTGAGGACGTACCTCCCTGCTTCTTGGTACCCGTACACGCAG  
CAGCAGCAGCAGCAACAACAACAACAACAACAGTATAACAAAAGAGAGCCCAATTG  
CAGCTTTCTCCCTTCTTTCTGCGCTCCTCGTAGAATGGATCCGACCGAGCTAAGACGG  
GTTTTCAAATGTTGACAGGAACGGGGACGGGAGGATCACGCAGAAGGAGCTCAATGAC

TCCTTGGAGAA GATGGGAATCTTCATTCCGGAGAACGAGCTGACTCAGATGATCAATAAG  
GTGGACGTCAATGGAGACGGCTGCGTAGACATAGACGAGTTCGGCACGTTGTATCAGACC  
ATAATGGACGAGCGGGACGAGGAGGAAGACATAAGAGAGGCATTTAATGTGTTCGATCAG  
AACGGGGACGGATTCATCACCGTTGACGAGCTGAAGACGGTGTGGCGTCTCTGGGACTC  
AAGCAAGGGAGAGCTGCGGAGGACTGCAAGAGGATGATCATGAGAGTCGATGCAGACGGC  
GACGGAATGGTCAACTTCACCGAGTTTAAGCAGATGATGAGAGGAGGC GGCTTCGCCGCC  
TTA

>Unigene20577

ATGGCTTCACCATCTGAACTAAGCTTTGATATCAAACCCCAAATGTATTCCATGCTTAAA  
AAATCTTTGGGAGAGCAAACAACCTGAGCAAACACAGAAGCTTGAAGAATTTCTAGCTCGT  
TTAGAGGAGGAACGTCTCAAGATCGATGCGTTTAAACGTGAGCTCCCCCTTTGCATGCAA  
CTCCTCACGGACGCAATGGAGGCGTCGAGGCAGCAACTACAGTCTGAGAGGGCGAGCCGA  
TCTGAGGCGAAGCCAGTGCTTGAAGAA TTCATTCCGCTCAAGAAGACGAGTG CATGTAAT  
AATATGGAGATGAGGGAGGGGAATTTGTGTGGCGATAAGGCCAACTGGATGACATCTGCA  
CAGCTTTGGAA TCAAGAAATTGAAGGGACAAAAGCCCCCTCAATCTCCAGTAATGGCATCT  
TCTGATCAAGAAACTGATATCAAGTTAGGTTTGAATGGGAAACACAGAATGAAGGGGGGA  
GGGGCTTTTCTACCCTTTCTGTCCAAAGATGGTGATGAGGCATTTCCAGAGTTAGCTCTT  
AACTCATCACAAAATACAGAAGATCATATGGAAGATAAAAAGAAATTCCTCAGAAACAATT  
TCTAGAAGGGAGAATTCTGGTAAGGGTGGCAATTCTTGTGTTGAGAAAGAGCAAGTGAGT  
GGGACATCAAATACAGCTCAAACCTCATCGAAAGGCCAGGCGGTGTTGGTCGCCGGACTTG  
CACCGCCGGTTTGTTAATGCTCTTCACATGTTGGGTGGTTCACAAGTGGCTACTCCCAA  
CAAATTAGAGAACTGATGAAGTTGATGGA TTGACCAATGATGAAGTTAAAAGCCATTTG  
CAGAAATACAGACTTCACACAAGAAGGCCCAGCCTGAGCCCACAAGCGCCAGTCACGGCG  
ACCCCCAGGTGGTGGTCTGGGCGGCATATGGGTCCCCCAGAATACGCAGCAGCTGCC  
GCCACGGCGGAGCGCCAGCTGCTGCTGCGCTGTACGGCGCTCACGCCGCGGCCACTCAT  
CACGTCTCGCCTTCTTTCTGCTCCCCACACCACAGGTCCCTCAAGAGATCTACCCTGCA  
ATAGCACCGCCACCTCCGGCGACCAACCACCAGCTACACCACCACCATCAACGGCCAC  
CACCACCACCACCAACAGCTGCATATGTACAATAAGTCTCCATTAAACACAGAGAAACAGC  
TCTCCTGATTTCGGATATC

>Unigene11380

GAAGAAGACGACGATGAAGAAGCTCTCTCGCTCAGCGATCTCCCACTCATTTCGTGATCC  
AACGTCGACGAAGAAGAAGAAGAAGAAATTACTCCACTCGTAGACTCTGCAACTCACGAT  
CAGGATTTCGATTTCTGTCTTTTCGAAGGAATCGGAAATGTGCGCCGCCGATGAAGTG  
TTCTTCCAAGGCCAGATTCTGCCGCTCCGCCATTCGATCAGCTCCGAAAAAGGATCGCTG  
CTGTATTCCAGTCGATCCGTTTCCAGGTCCGAATCAATGGACCATCCCTATTTCGGGTCCG  
TTAATTTCCAGCCGGAGCAGCAGCATCAGCAGCCACCAATCGTCCAGCAGCGGCAGCTCC  
TCCGCCACCGCCGCCGGGAATCACAATCACCGCCACAGACTACCGCCGCGCAACCAATTC  
CATTCCCATTCCCACCCGAGCCCATCGCCGCGGTCAATTTACAACCCACAACCCGCGA  
TTGAATCACCGGAAATCCGTGAGCAAATCGTCCGTCTGGAACATCCTCCGGCTCGGTCTG  
GTGACGGCGCCGCCGGGAATGGCGGTTACGATCTCAAAACGCGGAGCTCCGGGGGTAAT  
TTCGGTAGCCGTACAGCACGAGCAGCAATGGCAGCTCCGTTAGCAGTAGTGCGTCGAAG  
AAGAAGAAGAAGGGGAGAGGGTTATTGGGTGGGTGCAAGTGCTCGATGGATGCAGTTGAT

ACAGTTCCTTCTAGAGTGGTGATAATCAAGAGGAGCGCCAGCGAGAGTGAGGTGGAATTG  
CGTGAAACTGTAGGGGAGATAACCGGAGAGAAGATTGGCGCAAAGCAAACAGCGAAAAAG  
TATCTGTCGCATCATCGAACATTTGAATGGTTGAAACAGCTT

>Unigene29777

CAACAACAGCAGCAGAAACCTGAGAGTACGGAGAATGACAATCGTTCTGAGTTCGAGAGG  
GGCTTGGAGGAGTTAATGAATGGACATTATGATGAGTACATGTCCTTTGCTTCCTGTAGT  
ACACCTAGAACAACACTACTACGGAGGATGAGGAAGATGAAGGGGAACAGCTCATCAGGAGG  
AGGAGGAGGTCCGATCTTGATGGTGATGACTTGGCGGAGTCTTCTGCTGCCAGGAGACGC  
CACTCAAGGATTTTGA GCCGGTGGGCTGCCCCACAAGCGCAGGAGATGATCACCAACAATG  
GAGAGGAGGAATCGTGAGTCAGAATTAATGGCACTTGCTGGTTGCATACTGTATCAACG  
CTTGATTCGTCGTTCTTAAGGGAGTCTCAATCCCCTACCTCAAGGCGTGCTAATGTGGAG  
AGGCTTGGGACTCGCGCCTCGTCCATCTTGCAAATGTGGCGGGAGTTAGAGGATGAACAT  
GCACTTAATCGTGCTCGGGAGAGGGTGAGAGTGAGAAGGCTGCAGAGGCATAGTTCTAAT  
ACTAGTGTATCCATGAATATGTCAGAGGGCAGAGAACTGAGAATCATAGTAGCCTGGGG  
GATGCCAGTGAGAGTGAGAATGATTATGCTTCTTGGTCTCACAAATCAGTTGTCCCCACGG  
AATAGGAATGGGGACAATGAAAATTCCAGTCGGGAGCAATCTCCTGATCTTGAGAAATT  
GAGAGAGAAAGAGTGAGGCATATTGTTCTGGATGGATGGAGAGTGGCATCAGTGATAAT  
TCTTCTAATGTTGTGCAGAGAACTGACAGTCCCAGAGCTGAATGGCTGGGGGAAACTGAG  
CGTGAGAGGGTGAGGATAGTGAGGGAACTGATGCAGATGACAAGCCAGCAAAGAGGTTCT  
CCTGATGGACACAGGGAAGAACATGATAATGGATCTGGATCTCAAGTTGCTAGTGTTCTG  
GAAGGGTCTGTTGTTACCAGTCAGAATGTTTCGCAGGGACAGGTTGCGGTTGCGAGGAAGA  
CAAGCTTTACTTGATTGTGTTGTAAGAGCTGAAAGGGGAAA GACAAGGAGAACTTCAGGGT  
TTGTTGGAGCACCGTGCTGTTTCTGATTTTCTCACCGCAATCGTATTCAATCACTACTT  
AGAGGTAGATTCTTGAGAAATGAAAGGCCATCTGAGGAAGATAGATTACCTTCAATGGCA  
GCGAGTGAATTAAATCAGTTGAGACAGCGACACACTGTCTCTGGCATGAGGGAAGGGTTC  
CGCTTTAGGTTGGAAAATGTTGTGCGCAGCCAAGTAAATAGCCCTCCCGAAGCCTCATCT  
AATAATAGCAACAGTGCTTCAAGACATCATCCACAAAATTCAAGTTCTGTGCAGGAAGTT  
CAACATGAGAATGTGGAACTGATAATCATCTATTAGCAGAGCGTGTCTGGAA TTTGAA  
GGCAACACAGCTGTTCAAATCTACATGTTTCTCCTGATCTAGGAAGTGATTGGCAGGGA  
CTTGTTACTGAAGTTGAGGGAGAAAACCAACCAGTTTTCTAGTGCGGATTCTAATGGA  
TGGACCCATAGCCATTCAGAAAGCATAGATCTGAATTGGCAGGAAAATTCAATGTCTGGG  
TGGCCTGCAGAACTATTACCAATGAAAATAGAGGACAACAAATGCAAGAAGCTCAGGAG  
GCTTGGCGTGATGTTGGCTCTGTAGAAGGTGTTGAAAATTGGACGGAAGCCCCTGCAGAC  
CCTCCAAGAATGCTGCGGTTCAATCCATCTAGAAGGGTCAGCAGGTTCCACCCACCTGAT  
GATGACAACGTGTACAGCATGGAACCTAGGGAACCTCTAAGCAGGAGAAGTGTCTCGAAT  
CTTCTTCGCAGTGGTTTCCGTGAGAGCTTGGATCATTTGATTCAATCATATGTAGAGAGG  
CAGGGTAGATCTCCAATTGATTGGGATCTGCATAGGAACTTGCCTCTTGACCATCGGCT  
GAGAGGAATTCAGACATACAGAATGATGAGCGGAATGAGGATCAGGGTAATGCTATTGGT  
AGACCTCCACATATATTGTCAACTCCTCCAGCACCAACCACCACCACCCCTTTTGCAT  
CAGGATTTGCATCGTTCTAGTTGGTCTCGTCACAATGTCCATCGTTCGGAGCTCGACTGG  
GAGATGATCAATGATCTGAGAACAGATGTGGCAAACTTCAGCAAGGTATG

>Unigene30364

CAGCAATCCGCCAAACAGGGGTACCCAAAGTCGAAGAACCAGAGTTTGACACCGAGTGAT  
GATGATGACCCTGGATTGACAGCTGAGAATAGTGGTGAGGATGGGAAGAGGAAAACGTCT  
CCATGGCAGAGGATGAAGTGACGGACAACATGGTGAGGTTGTTGATCATGGTGGTGTAC  
TACATTGGTGATGAGGTGGTTTCGGAGGGTAATGATTCTGTGTGTAAGAAGAAGGGTGGT  
GGGTGTTGCAGAAGAAGGGGAAATGGAAATCTGTGTCGAGGGCAATGATGGAAAGGGGG  
TTTTATGTGTCTCCACAGCAGTGTGAGGATAAGTTCAATGATTTGAACAAGAGGTATAAG  
AGGGTTAATGACATTCTTGTAAGGGTACTTCTTGTAAGTGGTGGAGAATCAGAGCTTG  
CTTGATTCCATGGATCATATATCGCCTAAGATTAAGGAGGAAGTGAAGAACTGTTGAAT  
TCTAAGCACTTGTGTTTTAGGGAGATGTGTGCTTATCATAACAGCTGTGGTCATGGCAAT  
GCTGGTAGTGGTGGTGGTGGTGGCGGCATTCTCCCTCTTCTCCGGAAGCTTCCACT  
GAGCAGCCACCAGCTCAGCCGCAGCAACAGAGGTGCTTGCACTCATCGGAGAAGCCCCCG  
GTGATGCCCAATTTGAACCGAGGGGAGAACGAGGGGTCTAAATTGGGGAAATTGACAAGT  
GATGATGACGATGAGGATGACGAGGATGAAGACGACGAAGATGAGGATGATGATGATGAG  
GAGGATGTTAATGATTCGAGGAAGAGGATGAGGAAAGGGACGAATCATTGCGAGTTGCTG  
GTGCAATTGGACGCGGAGATGATGAACGTGTTGAGAGACGGGTGCAAGAGCTGGTCGGAG  
AAGAGGCAGTGGATGAAGGCCAAGCTGATGGTGCTGGAGGAGCAGAGGGTGGGGTTCCAA  
ACGCAGTCGTTTGAGCTGGAGAAGCAGAGGCTCAAGTGGCTCAAGTTAGCAGCAAGAAG  
GAGAGAGAAATGGAGAGAGAGAAG

>Unigene22730

GGAGGATGCTGTATAGCGAGGTATAAAGGTGGAGGGGCATACGATGTATCTAAGATGGAC  
AGGATCCTGCTGAGGTTTCGTCCCATAGCTCCCAAACCAGCTTCTGTTAGCAGATCAGCT  
TCCGGCAGCGACTCCACCGCGCCGGAGAACACCACCGCCCCACTCAAACGAGGTTCTGGG  
AGAAGACGCCGTGTCGGTGTGCTAAAGGTGGTAGTAAAGTTAGTGTTGGCAGGAGAAAC  
AACAAATAGGAAGAAGAAGAAGAAGAAGATATCGTCGAAAAAGCCGACTCCGGTGGATCG  
GTGACCGGGGGTGTCAATAACATCAAGACTTTGACGTTGCTTCCGGCGACACCTGTCGTG  
AAAGAAGCTCCGATGCTCAGCTTTGAAGAAAATGGTGGAAATTATGATGGTGAGGTGGAT  
CCGGCGACGGTGAGAATGAAGGTTGAATGCGTGACGGAGGC GTGGTTGGTCGACGGTTAT  
CCGTACTGGATGGGGCGTACGGATGAGAAAATGGTTAGGGATTTGAAAGCTGACACGTGT  
CCAGGATTTATATCTGATGGGTTGAATAGGGTGATGTGGACGAACGCAGCGTATCGGCGA  
ATGGTATCGGGAAAAGGGGGGGAGAAGGTGGTGGTGGAGTCAGGGGTGGCGCTCCCGGTA  
GGGAGTGCGGCGTTCACGTGCAGGGTAAGGGTGGTCACGTGCGGTAAAGAGAAAGATGTGT  
AGAACGGTGCCATGTGATGTGTGGAGGATGGAGTGTGGAGGGATTGCATGGAGGCTTGAT  
ACCACGGCTGCTCTCTCCCTT

>Unigene12886

ATGGCAGCTCCAAATATGGCCACTATCACAGCATCTTTAGAGAGATCTCTGCAGAACTTC  
TCGTTGAACCACCAACACGGCGGCAGCGGCAGTAGCAGCAGCAGCAGCGGAGGGGGG  
GCGGCGCGTGGGTCGGAATCGCCGCCGGTGGACGCGGTGGAATCAATTCGAATCCTCC  
CTCCCCCTTCATTGGGAGCAATGCCTCGATTTAAAGAGTGGTGAGATATACTACATAAAT  
TGGAGAACGGGGATGAAAGCGACGGAGGATCCGCGGACGACGGCGGCAGCGGAGTACATC  
GGCGAATGTTACTGGGAGGAGGAAGACAGCAGCTCGTACGACAGCGAAGAGTCGTCCTCC  
GAAACGTCGCCGTCTTCGTCGAGAGAGCAATGTAATGGTAACAATTATTATTATAATCAA  
GAAAATGAGATTAATAATAATTCAAATAATAATTCAAATAATAATGTGCTGGTGGTGGCT

GGTTGCAAGAGCTGCTTAATGTATTACATGGTTCCCAAACACCTCCAAATTTGCCCCAAA  
TGCTGTGGTCAACTCCTCCATTTTGATCGATCCGATAACGCCTCTTCT

>Unigene40408

AGAATCAACGGCGAATTCCATATTCCCACGTATGTGATTCAACACATACAGTCACATCTG  
ACCCCAAAGAAGCCGCTCAAACCTACTCTCTAAATCATGGCACACCGCCTGGTCC  
ACTGGCCCAATTCTCTATTTGACTGCGCAAATTACCCTAATAAAGATCAATTTTGGGCA  
TTCACGACGAAGACGATGCAGAGGTATGAAAATTTAACTTAAAGGTGCAGAGTTTACT  
CTGATTATGAAATAAGGTCTGATTATAGTCGTATTAGCTGTTTAACTAATAATGAATGG  
GATGCAAAAGACATGAAAATTGCTGTGGAATTAATATCGAAAGCGATGAAGATGGGCACC  
GTAGATTTCAATTTTGGATTTTCTGATGCATGGAATACAAGTAAAAAATTCACTTTACCA  
CATGAGGTGCTCGAATTCGAAACCCTAATCAGATTGTCTTTGTCTGGGTGCACAATTGAA  
TTGGGAGGAGGAGGAGGAGGAAAGGTCAATTGTTGGGATTAAATCTCTTCGTTTAAAG  
GATGTTCCGATAAAAAATAGT

>Unigene406

ATGGGTATATTTGAGGAAATGGGTTTCTGTGGTGATGTTGATTTTCTGTCAAGTGGTTGT  
GGGGAAGTGGAGGTTTCACCAAGTAGTTGAACCCACGATTCAGATTGATGAAGACTACAGT  
GATGATGAGGTGGATGTTGATGAGCTGGAAGGAGGATGTGGAGGGATAGATTGCTCTTG  
AAACGGCTCAAGGAGCAGAAGAAGAGCAAGGAAGGGGGTGTGATGATGTCAAGAAGCAT  
CGTCATTCGCAAGAGCAAGCGAGGAGGAAGAAAATGTCCCGTGCACAAGATGGCATCTTG  
AAGTACATGTTGAAGATGATGGAAGTGTGCAAAGCTCAGGGCTTCGTCTATGGCATCATC  
CCTGAGAAAGGGAAGCCGGTGAGCGGAGCATCCGATAATCTCCGGGAGTGGTGGAAGGAT  
AAGGTCCGTTTCGATAGAAATGGACCGGCTGCTATAGCCAAGTACCAGGCCGATAACTCC  
CTCCCGGGGAAGAACGAGGGGTGTAACCCGGTCGGGCCGACCCCTCACACCTTGCAAGGAG  
CTCCAAGACACTACTCTTGATCCCTGCTGTCTGCACTGATGCAGCACTGTGATCCGCCA  
CAGAGGCGTTCCCCCTGGAGAAGGGGTCCCGCCTCCGTGGTGGCCACCGGGAAGGAG  
GAATGGTGGCATCAGTTGGGGTTACACAAGGATCAGGGGCATCCACCTTACAAGAAGCCT  
CATGATCTGAAGAAGGCTTGGAAGGTGGGTGTTCTTACAGCAGTGTCAAGCACATGTCT  
CCTGACATTGCCAAGATTCGGAAGCTGGTTAGACAATCCAAGTGTTCGAGGACAAGATG  
ACTGCCAAGGAGAGTGCAACATGGCTGGCTATCATCAATCAGGAGGAGGCCTTAGCTCGG  
GAGCTTTACCCCGATCGCTGCCCGCCTCTGTCTCGTCCGGTGGCAGCGCCACCTTCGCG  
ATGAACGACAGCAGTGAGTACGATGTAGACGTGAACGATCACGAGGAGTCGAATTTGAT  
GTGCAAGAGCAGAAACCAGCCACACTTGGTCTGTTGAACATTGGTGGGATCAAGGATGAG  
GTGATCACC AACTTGATTTCTCTAGGAAGAGAAAAAGGGGCAATGAAGTGAACCTTGATG  
ATGGATCACAATAAGATATACACCTGCGAGTATCTTCAATGCCCTCACAGTGATCTTCGA  
CATGGCTTTCAAGATCGAGCTTCAAGGGACAACCATCAGATGGCTTGCCCTTACACTCAT  
TCCTCCCAATTCGCCGTCTCAAACCTCACCATCAACGACATCAAGCCGATCGTCTTCCCT  
CAGTCGTTTATCCAGCCGAAGCCGGCTAGCCACACACCAGCAGAACCACCACCACAACCC  
TTTGATTTATCAGGCCTTGGAAGTACCAGAGGAAGGTCAAAGGATGATCAATGAGCTCATG  
TCCTGTTATGACAACAACATCCTAGGAAACAAGAACCACCAAGGAAGGCTACATTAC  
AGCCAAGGAATGGTGTGGATGGCAACATGTTGATGACGACAACAACAACAACAGT  
AGCCACACACACAACGGTTCATGTTCCGTTGACGACGGATCGGTTGACCAAGTGAAG

GTCATAAACACACCATTCAATCACAACACAAGTGACAATTTCCAGCTAATGTTTCAGTTCT  
CCATTCAACATCTCTCCTGTTGATTACACGGAGAATTTCCATGGAGGTGCAAGGGATAAC  
CTGCAAAAGCAGGATGTCTCAATCTGGTAC

>Unigene56776

ATGGCGACCTACTTTTCATGGGAATTCTGAAATCCAAGGCGGTGGCGACGGTCTTCAGACA  
TTAATTCTCATGAATCCAGCCTACGTTGGATACTCCGAAACACAACCGCCCACAACCGGC  
AACTTTGTGTTCTCAACTCCAACCTCCGGGAACACCATCCACCACGCGCCCGGTCT  
CAGACCCAGCATTTGTCGGCGTCCCCCTTCACGGCACCACTTCCACCACCACCACCACC  
ACCTCCGCACAGGACCAGCAGCAGCAAGATGTTTCCGTCCTCCACGGCTTCCACCCGCGC  
GTCTCCTACAATCTCTACAATCTCCCCATGGACCTCGGACCGGCGCGTGACATAACGCGC  
GCGCAGCAGGGGCTGTCCCTGAGCCTCTCTCCCAGCAACCACCGGGATACGGTTCCTTG  
ACGCAGCCTCTGGGGTCGCCCCCGCGC

>Unigene10960

ATGGATCATTACAAGGTTTTGGGGGTTCAAAGAACGCGAGCAAGGAAGAAATAAAGCGA  
GCTTTTCGAAAATTGGCGATGGAATTCACCCTGACAAGCATTCCCACCTCCAACAAT  
TTGAGGAATCCGCCACCCAAAAGTTCAAGCAGCTATCGGAGGCCTACGAGGTTCTGATG  
GACGATCACAACGCGCCGATTATAATCTCAAACGAAATGCGTATGGGACTCATCAAAGT  
AGACGATATGATCACCGGTACGGCGGCGGCGGCGGCGGTTATGGTCATAGCTATAGCTAT  
AGCAATACTAGATCTTCTGGGTATGGATTTAGCGGTGCAAGGACCAGTAGCTGCTCCGAT  
GGTTTTGCCAAACTGGAGATGTTTATGCACTTTCTTAAGAAAGAGGAGATTTGCGATCAAT  
GCCTCTTTATTGGCATTACCTTGATTATGCTAGGTGGGGCATTATTGTTGATTCTGT  
GGCGAGGCATTATGGAAGTGCCTAATACCGGGAAATCTTTCGAGGAGGCAATGGATTCT  
ATAGAGAGAGCTAAAGCAGACAAGGATAGTTCT

>Unigene52412

ATGAATTTCTTCAAATCAATTATATTAGACGATCCGGATCCCCCAAACCCGAAAGTCCG  
ACTGATTCTGGATCAAATCCCACCGTGAAACCATCTCAAGAAGATCACAGTCCAAACGAC  
GTCGTTGAGGATGGTGGTGGGTGGAGTTTCGGAGGCTTGATCAAACCTTTAGCTACCAGA  
TCCGAATCAGTGATCGAAACTTACAGCAGAGATCTGAAGGAATTTGGATCGGGACTCAGG  
AAAGAGAGCGAGATCATCAAAGAAGCGGCTAGCCGAGCGGTGAAGGAAGTTCCGGCGTCG  
CTTGAAGCCGGAAGTTGAGCTGCGCACGGTGTATTGGACGGAGTTCTGAAATCAACGGCT  
GAGATCATTGCGAAGGAAACGCAAGCTTTTGGGTGCGGATGGGGAATCGGAGACCCCGGAA  
ACGAACCGAAGCATGAATTCGGGTGCGGTATAGTCGCTTTGATGCGCAGTTGAGCGGTATA  
CAGAGTGATTTGAATACTTTCTGTGAAGAGCCGGAGGATGTGGAAGAGTATAAGGAGTGG  
AAATCAGGCTTTAAGTTGGATGATAAGATAGATGAAATTGATGAGCTGATTGGGGAGAAT  
GGGAGCTTAGAGAGTGTTTATAAAAAGCTTGTTCCAGATTCGGTTGATCACGAGACGTTT  
TGGGTTGATATTTTTACAGAGTGAATAAGCTCAAGCTGAAGGAGAAGGTACGAGCGAAT  
CTTGTGAAGAGGGCGATCGCAGCTGATGATGATGATGATGAATTGTCATGGGACGTTGAT  
GATGATGATGGGGATGAGAAGAAGGATGCTACTGTGAGTGAAATAAAGACTCTTGAGAAG  
GTGGAAGGAGGAGATGGAGCTGAAGGTAATGGAAGTTTAAATCTTGTTGAGAAAGGAGAG  
AATTTGAATGATGGACCACAACCTACAACGGAGAAGTCCAATGTTCAAGTGAATGATGGA  
GTTAACAACAATCTGGTCCTGTGCAAGAGGAGAATCGCGATGGGGATAGCACATTGGAT

GTAAAAGAAGGGAAGTCTAATGAAGTAGCTGAAGTGAAAAGTGAGGAGAGGATGAAACCT  
GAAGAAAGTGTCCAAGAAAAGGATAGCAAAGATAAGGGTGAGGCCGTGGAAAAGGGTCCG  
ACTAATCATCGGGCAGAGACAGAGGAAGATGATATGGGATGGGATGAGATTGAGGACGTT  
GATAGCGACAACGAGAAGAAAATCTCAACTAGCAGTCATGGAGAGAGACCAAACAGAGCA  
GAGGTGAGGAAGCAGTTGATTGTTGCAGATGATGATGAGGATTTGAGTTGGGATATTGAA  
GACGATGATGAGCCAGTGAAATCT

>Unigene20154

ATGGGGCCTAATTTGATGGATGAATTGGAGTTGTTTCGACCAAATTGATGATTTGTTAGAC  
TTCCCCCTTGATGATGAGTGTGGTGTATGCCACCTTAGTTGATTCCTACTGATTGCAAGGAT  
TTCCCCTCTTGGGATGACGCCCTGCCGGAATCCCACCTCTCTTCTCCGCCGCTCACGGC  
GACCTCTCCGCCGAGCTCTCTGTTCCGTACGAAGATATCGTGCAGCTAGAATGGCTTTCG  
ACGTTCTGGAGGAGTCAATTTTCGAGCGAAGGGTTGACCCTGGGGAAGGAGAACCTGCGT  
GGGAGCATCACCTCCACCAACCACCATTTCCAAACAATGAGTCCTGTTTCTGTGTTGGAG  
AGCAGCAGCAGCAGCAGCTCCTCTTCCGGAGGAAAGACGATGCCGCTTAGCCCCGGTCAC  
CGTGGACCGCAGCGTGCAAGGAGCAAGCGCCCTCGACCTACAACGTTCAACCCTAGGCCG  
GCAATTCACCTCGTCTCCCCCTCCTCCTCTCTGGCGACGCCCTGCCTATCCCCTGATC  
ACCCCCGGGTTTTATTCGGAGTCTGATAGCTTTGCTGAGTCCTCACCTTTGAAAACAAAG  
CCCAAGAAGATCAAAATAACCCTGTCCGAAGCTAAGCACACGACCCTCCCGTCCAAGCT  
GCTGTAAGGAAATGCCTACATTGCGAGATAACAAAGACTCCACAATGGAGAGCTGGACCT  
ATGGGACCTAAAACATTGTGCAATGCTTGTGGTGTTCGTTACAAGTCTGGCCGGTTGTTCT  
CCTGAGTACCGTCCAGCTGCTAGTCCCACCTTCGTTGCATCCGTCCACTCAAACCTCACAC  
AAGAAGGTCTGGAGATGAGAACCAAGATTGAGCCTAATACCACAGCT

>Unigene33886

TCGATCAATGATTATCTTCAAGCTCGTCCAAGTTCTGGATTTTTCACGGCATCGCCGCC  
GCCGCCGCCGCCGCGCAGCAGTCGGTGCCACTGTCTACTTGGCTCGGCGATCCAGCAAATTC  
CGGAGCCGAGTAATTGGCATTATACCCGCCCGGTATGCTTCCTCTCGCTTCGAGGGTAAA  
CCTCTTGTCAACATCCTCGGCAAGCCCATGATCCAGAGAACATGGGAAAGAGCGAAATTG  
GCTGCATCATTGGATCATGTTGTTGTGGCGACAGATGATTATAAGATTGCTGAATGTTGT  
AAAGGATTTGGTGTGATGTTGTGATGACATCAGAATCTTGTGCAATGGCACTGAGCGC  
TGTAACGAAGCACTTCAAAAGATTGGGAAGCGGTATGATGTTGTTGTCAATATTCAGGGG  
GACGAACCGCTCATAGAACCTGAAATAATAGATGGCATAGTCAAAGCTCTCCAGGATGCT  
CCCGATGCAGTCTTCAGCACCGCAGTCACTTCCTTGAAGTCTGATGATGCTTTTGTATCCA  
AATCGTGTAATAATGTGTAATAGATAATCATGGCTATGCAATTTATTTTTCACGAGGACTT  
GTACCATCAACAAGTCCGGAAAAGTCAATCCTCAATTTCCATATTTACTTCATCTGGGG  
ATTCAGAGTTTCGATACAGAGTTTCTCAAATATATCCAGAGCTTCCACCGACTCCTCTT  
CAACTGGAAGAAGATTGGAACAACCTGAAGGTCTCGAAAATGGCTACAAGATGAAGGTG  
ATAAAAGTTGACCATGAATGTCACGGTGTTGATGTTCCAGAAGACGTAGAGAAGATAGAG  
AATTATATGCGGCAAAGGAACTTAAGT

>Unigene27999

ATGAGCTCCGTTTCCAGCTCCACCGCAACCAATCCCTTCCGCTCTCCCAAGCTCAAACA  
ACGTCGGAGCCCTCCGGTCTGGAATCCGCCGAGGCTTTCATCAATCTCACTCAATCTC

AAGATCCAGGCGCCCTCCTCTTCCCCGCCGCCGCCGCCGCATGGGCCAGCTTCCGT  
CGTTCCAAGTCGGTGTCTCGATTGGGGATTTGCCGGCAGTTCGATCATAAAGTGGTGG  
AATTGGGGATGGGGCTGGATCTTATCCCGGAAACCTACTTTCGCTTCAGATCTAGAAATG  
AACGAAGAAGAAACGGCGGCTCTGGGCAGCCACAGCAAGGGCAGCTGGCGCCACGTGTAC  
TACAAGGTATCCTCCCAGCTCCGCCGCAAGCTTCGCGGCTCCGACAATGTTGACTCCCC  
CAGACCTTCCGCTACGACTCCTCTAACTACCGAAAGAATTTGACGACGGATCA

>Unigene408

ATGATGATGTTTGAGGATATGGGGTTCTGTGGTGATCTTGATTCTTCTCCTCCTCGGGT  
GGCATCAAGGAAGTTGAGGGCTGCCATGAGGCGGCGGAGGTGGAGGTGAGGTGAGGTG  
GAGGCGGTGGCGGAGGACGATTACACGGACGAGGAGATCGACGTGGATGAGCTGGAGAGG  
AGGATGTGGAGGGACAAGATGAGGCTGAAGAGGTTGAAGGAGATGAACAAGGAGAAAGAG  
GGGGTTGATGCTGCCAAGCAACGGCAATCTCAGGAGCAAGCCAGGAGGAAGAAGATGTCT  
AGAGCTCAAGATGGAATCTTGAAGTACATGTTGAAGATGATGGAGGTGTGCAAAGCTCAG  
GGCTTCGTTTATGGCATCATCCCGGAGAAAGGGAAAGCCGGTGAGCGGAGCATCCGATAAT  
CTCCGGGAGTGGTGGAAGGATAAGGTCCGTTTCGATAGAAATGGACCGGCTGCTATAGCC  
AAGTACCAGGCCGATAACTCCCTCCCGGGGAAGAACGAGGGGTGTAACCCGGTCGGGCCG  
ACCCCTCACACCTTGCAAGGAGCTCCAAGACACTACTCTTGATCCCTGCTGTCTGCACTG  
ATGCAGCACTGTGATCCGCCACAGAGGCGGTTCCCCCTGGAGAAGGGGGTCCCGCCTCCG  
TGGTGGCCACCGGGAAGGAGGAATGGTGGCATCAGTTGGGGTTACACAAGGATCAGGGG  
CATCCACCTTACAAGAAGCCTCATGATCTGAAGAAGGCTTGGAAGGTGGGTGTTCTTACA  
GCAGTGATCAAGCACATGTCTCCTGACATTGCCAAGATTCGGAAGCTGGTTAGACAATCC  
AAGTGTTTGCAGGACAAGATGACTGCCAAGGAGAGTGCAACATGGCTGGCTATCATCAAT  
CAGGAGGAGGCCTTAGCTCGGGAGCTTTACCCCGATCGCTGCCCGCCTCTGTCTCGTCC  
GGTGGCAGCGCCACCTTCGCGATGAACGACAGCAGTGAGTACGATGTAGACGTGAACGAT  
CACGAGGAGTCGAATTTTCGATGTGCAAGAGCAGAAACCAGCCACACTTGGTCTGTTGAAC  
ATTGGTGGGATCAAGGATGAGGTGATCACCACCTTGGAATTTCTCTAGGAAGAGAAAAGGG  
GGGAATGAAGTGAACCTTGATGATGGATCACAATAAGATATACACCTGCGAGTATCTTCAA  
TGCCCTCACAGTGATCTTCGACATGGCTTTCAAGATCGAGCTTCAAGGGACAACCATCAG  
ATGGCTTGCCCTTACACTCATTCTCCCAATTCGCCGTCTCAAACCTCACCATCAACGAC  
ATCAAGCCGATCGTCTTCCCTCAGTCGTTTATCCAGCCGAAGCCGGCTAGCCACACACCA  
GCAGTACCACCACCACAACCCCTTTGATTTATCAGGCCTTGAGTACCAGAGGAAGGTCAA  
AGGATGATCAATGAGCTCATGTCCTGTTATGACAACAACATCCTAGGAAACAAGAACC  
ACCAAGGAAGGCTACATTCACAGCCAAGGAATGGTGTGGAGGGCAACATGTTTCGATGAC  
GACAACAACAACAACAACAGTAGCCACACACACAACGGTTCCATGTTCCGTTTCGACGACG  
GATCGGTTTCGACCAGTGCAAGGTCATAAACACACCATTCAATCACAACAAGTGACAAT  
TTCCAGCTAATGTTTCAGTTCTCCATTCAACATCTCTCCAGTTGATTACACACAGAATTT  
CATGGAGGTGCAAGGGATAACCTGCAAAAGCAGGATGTCTCAATCTGGTAC

>Unigene48122

ATGAGAGATGGAACTTGAAGAAAAGTAAGCTTTCATGGCCTAAGACACTAGTCAAGAAA  
TGGTTGAACATCCAGAGTAAGGATGAGGATTTTCATGCTGATGAATTCATTATGCAGAT  
GTTGATGAAGAATGGAGGAATAATTTCTCAGAGAGGGATTTATGCTCTATCAAGAAAAGC  
AAAACAGAGCAATTGAATACTGAAAATCACGACTCTGTGCGAAGAAATAAGATTGGGTTC

>Unigene39432

ATGGGGCCGATCGTCAAGAGGAAGAAGAAGGGGAGGCCGCGAGGGCAGATCCCGGTGCC  
AGGGACCTCCCGTCGGCGGAGCTGACCTCCGGAGAA GCCTCCGTCGCCGGAATGTGAAG  
TACGTCTTCGACCTCGACGATTACTTCGACGAGGACGAGGTGTTCGCCGACGACGAGGAC  
CAGCGACGGAGAGAGAAGAA GCTGAAGCTGCTACTGAAGCTCCAGGGCGGGCGCCGATCCC  
GAGTCAACTGGTCTCCACGCGCCTGCCAGCTCGGCGTCCTCGTCGGACGATGGTGGGAAG  
CCGTCGAAGAAGCGGAAAATCGACGAAGAAATGGACGATGATGTGGATGACGATAATGAG  
GAAGATAATTATAATTATGAAGACGATGAAGAGGTTAGAGATACAAAGCCAGAATCCAAA  
GCTGATGACTCTCCACCAGGGACGCCGCGTGTGGGCCACCGATGCCGGAGAAGAAGATT  
CTGGAGTTAATTCTGGATAAACTTCAGAGGAAAGACATTTATGGTGT TTATGCAGAACCG  
GTTGATCCAGAGGAGCTTCCGGATTACCACGATGTGATC GAGCATCCAATGGATTTT GCC  
ACTGTGAGGAACAAGTTAAGAAATGATTCATATCCAACCTTTGAACATTTT GAGAGTGAT  
GTCTTCCTCATTTGCTCAAATGCAATGAAATACAATGCACCAGATACCATATATTACAAA  
CAGGCGCGCACCATCCAAGAGTTGGCGAGAAAGAAATTTCAAAAATTAAGGCTGAAAGCT  
GAACACACGGAGAAAGAGATCAAACCCGAGCAGAAAACAAGGTCCGGCTCCCTTCCAAAA  
AAGCCAATCAGAAGGTGTGGGAGCCGGACACTGCAAGAACCTGTTGGCTCCGATTTTCA  
TCTGGAGCCACTCTTGCCACAGTGGGAGATTCCATAATGTTCCAGTACACTCCAAGCT  
GTTGGGTCCGAGAAAATGGGTGGTGCAGATGGGCTTGTTGAGGGAAGTCTTTCTTGAAC  
GATTACTGTTATGATAGGGTCGAAGAATCCCTGCCAGGAAAGGTCCACTGTCTCGATTT

GGTAGGAGATCATTGTTCAGATGAAAACCGTCGTGCAACATATAACATTTCTTTGGCT  
CTTCCTGTGGCCAGCTCAGAGTCTATATTCTCAACCTTTGATTGCGAAACCAAGCAGCTT  
GTTCTGTAGGACTTTATTCTGATCATTACATACGCCCCGAGTCTAGCTCGATTGCTGCA  
ACTCTTGGATCCGCTGCCTGGAAGGTTGCGTCTAAGAGGATCGAACAAGCACTACCTCAA  
GGATTCAGGTTCCGGTCAGGGTTGGGTTGGAGAGTATGAACCACTCCCAACTCCTGTACTA  
ATGGTAGAAAATTGCTGTGTTAAAGAACCTCCGTTTTTAACAAAAGCAAAGCCTGTTGCT  
AATCCTAAGAAGTTTGAGAAGACCCCAACAGTCCTGGATTCTTACAAGGATGATAGCCCA  
CGTAGCGAGCCATTCTGGGACAAAAGTTGCCGTTTCTTTGTCCCCCGGAATCAGACCA  
CCTTCTGCTTCTGTGCTCGCTACACAGCCGATCAGAGGGAACATTCAGAGATGAACATG  
AACCCATCCTACTTTTTGTCTCCGGGATCAAACCTAGTAGCCCTCGTAGTAATCTCGGT  
TATCATCATCAAAATCTTCAATCCAGGGCTGTGCATGAGTCTGAAAAGAAGGCTGTAAAG  
CAGGTGGAATTGAATAGTCCTCCATCGTCGAATAATGTTGCATCTGATTCTTTTGCAAA  
AGACAGTTTCGGAAGAGTTCAGAAATGGAAGCCTCCAGGCCGATGGACTACTCGCCAAAG  
AACACAAACCTCCCACGAACCGGATCGTTTTAAAGGCCCGATCATAGCGATGGGGTTGCT  
ATGGTAGGAATGCCTAATGGAAAAATCATGGGTAATAGAGTGGATAGTGACACTACAATG  
CCTAGTTTGTCTTCTGATTCAGCAAAACAGCCGGGTATGTGCAACAGGGTCAAGGTCTC  
AATGACCCTGTCCAGATGATGAGAAAGATGTCTGAAAACACTCATAATCAACAAAAACCC  
TCGAGGCGATCGCCAGCCAATGTTTCTCAAGTCATGCCTCCATCGCCATCCTTGAACAGC  
AATGGATGGAATGGGAATGATCCGAACAATGCTGCTGCTGCTGCTGCTGCGGAGCATGGATG  
TCTGTAGGGGCGGGAGGGCTGAGACCTGTTGCTGAAAATGCAGCAAATCCGAACAAGAGC  
CAAATGTACGGTGATCCAGTGTAACAATTCGCTCGGCAACAGTTTCGAGGAGAGTTCCCT  
CATGGAGCTCCTCTCCATGCTTTCTGACCGCAAGGGCCAATACCTATGTTAGTGGGCAAT  
CAAGTACAGTTTCAGAACCAGCGAATGGTGTTCAGGCCAGCTGGCGACCGCTGATTG  
TCGAGGTTCCAGCTGCAGCCGAATTGGCGGCCACAAATGCATTGAGACAAAAACAGGAA  
TCACTACCTCCAGACTTAAACATAGGCTTCCAAACATCCGGCTCCCCCGACGGCCCTCT  
TCCGGTGTGCTGGTCGATTCCCAGCAGCCCGATTTGGCTCTACAGCTC

>Unigene43199

ATGGGAAACTGCCAAGCCATTGATAATGCAACTCTTGTAATCCAACACCCTAATGGCAAA  
GTGGACAACCTCTTCTTCCCTGTTCTGCTTCTGAAATCATGAAGGCCAACCTGGTCAC  
TACGTTGCCCTCCTCTACCAACCACCCTCTACTCTTCCACCGCTTCCGCCGCCGCCGCC  
GCCGCCTCCAACAACAAGGACAACAAGAACCTCCCTCTTCGTGTCACTCGCATCAAACCTT  
CTCAGACCAACTGATACTCTTGTCTTGGTCATGTCTACAGACTTGTACCTCTCAAGAA  
GTTATGAAGGGATTATTGGCAAAGAAGCAAGCCAAGATGCAGCAGCTGAAAAATGTAAAT  
ATGAGAGAGAAGAAAATTCTGATTTTGAAAAAATGATGGAAAGAAGAGCAATAATCAG  
GCAAAGCAAGAAAGGCACAGATCAAGAAACAACCCACAAGTAAACTCAGCTGCATCCACA  
TCCAGAGCATGGCAACCAGCATTAAAAAGCATTCTGAAGCTGCAAGC

>Unigene30075

ATGGGCTCTTCCCAATCAGCTCAAGTCCCCTCCTCTGACGAAGCAGAAGAAGAAGAA  
GACGACGACGTTGAGGACGAAGACGACGACGTTGAGCAGAACCTCACCTGAACAGCAC  
GATCATGTCAAGAAAAATCCTCGAACAAGAGCCGGAGATGCTGCCGTGTCACGCCTCCGCG  
TCGCCGCTGTGCGCCGAGCTCTCCGCTACGGCACTCCCCGCACCGGACCTTCCATCAAG  
GTGTGGGACCCTTACAATGTCTCGCGCCGCTCCGTCGCTGCCGCCGCTGACGCAGCAC

TTCCACCGCGGCTTCCCGGTGGCCCCCGCCGAAGACGATCGGGCGGTACCGAAGTGAC  
TTGATCAGCCACGGCGAGTGCCACATGAATTTGAGGCCTGATTGATCGCCGGGCGCTGC  
CCCGATGCGGCGTTAACCTCCAATGGGAAACGACAAGCTCGTGCCTTGGCCGTGTTCTTG  
AAGTCTCAGGGGGTGAGGTTTAACGCCGTTTACACTTCGCCGTTGGATCGGGTTCGGGCC  
ACAGCGCAATCCGTTTGCCAGGAGCTGAATTTGCAGAGGAACATGTACAAACATCCGAT  
GCACTTCTCGAGATGAGCCAAGGTCAGTGGGAAGGATGCCACAGGTCCGAAGTTTTCACC  
CCCGAAACCACGAGTATAATGGAGAAAATTCCAGCCTGATTTTTCACCACCATCCGGAGAA  
TCACTCAGGCAAGTAGAGTTCCGGATGGTTCAGTTCCTAAACAGTACGGTCACGGCATT  
CCTGACAAATTTAGGTCTGATTTCTCCCCACCAGATCCTAGTGACAACCCAGCCTTCCAG  
AACCATAGCTCTCACACCTTGCCAAACATGATCAATCACCGAGATGGGCCGTCTCTCGTA  
CCTCCGAGCTGGGAGCTGCTACGCAGGCACCGGCAGGGACTCCCGAGGAAGAAATCGGGC  
AAGAGCCGGCTCCAAATTGTGGCGACTACGGGTGATCACGAGGCCGACGATGAGATGTGC  
CCCCGGGAACCCATAATCAAGGACTAATCCGAGACATAAACGTCCGGACCGCCCCCTCG  
CTCGTCACTTCTTGATTGGGGTTTTAGTCACTCCACACCGATCAAATGCCTTCTCACT  
GGCATCCTCGGCTGCAGCCCGGTGATGTCGCAGAAAGCTTTGCATCGAAGATTCTTCGGTC  
ACCGTGCTGCAACGTTCTTTGAAATTCGGGTGGCAAATAAAGAGACTGAACGATACGTCA  
CATCTTAGGCTTCTT

>Unigene24314

ATGTCATCACTAACTAAAATGGAAATCGTACCTCCACTACTGCTCCTCCTTCTCTGTACC  
CTCCTCCACACCTCCGCCGCCGGACGCCGCGGCGGCATCGCCGTCTACTGGGGCCAGAAC  
GGCAACGAGGGAACCCTCGCCGAAACCTGCGCCACCGGCAGATTCTCCTACGTCAACATC  
GCCTTCCTCAACAAATTCGGCGGCGGCCAAACCCCGAGCTCAACCTCGCCGGACACTGC  
AATCCCGCCACCAACTCCTGCCGCGTCGTCTCCGACGGAATCCACGCCTGCCAGCGCCGC  
GGCATCAAGGTCATGCTCTCAATCGGCGGCGGCATCGGAAACTACTCTCTCCTCCAGA  
GAGGACTCCATAGGATTCTCCATCTACTTATGGAACAATTTCTCGGCGGCGGCGGCGGC  
GGATCTGCAATCCGCCCCCTCGGCGACGCCGTTTTGGACGGAATAGATCTGGATATCGAG  
CTCGGATCTCCCCTGTTCTACGACGTTCTCGTGACGCATTTGAAATTGCTGAGCAGGAGG  
CGGAGAAGAGTGACGTACCGGAGCGCCGCAGTGCCCGTTCCCGATCGGTTGTTGGGG  
GCGGCGCTTAATACGACGGCGTTCGATTACGTGTGGGTGCAGTTCTACAATAATCCGCCA  
TGCCAGTACACTCCGGGGAACATTGAGAATTTGAAGAATTCGTGGGAGGTGTGGACGAAT  
TCTGTTTACGCTGGGAAGATATTTTATGGGCTTCCCGCGGCGCCGCAGGCTGCCGGAAGC  
GGTTTTATTCCAGCGGATGTGGTGACGAGGGAGATTCTTCCGGTGATTAGGAGATCGAGG  
AAGTATGGTGGAGTGATGCTGTGGTCGAAGTTTGGGATGATCAAAGTGTTATAGTACC  
GCA

>Unigene30783

ATGTCTCAAACAACTGGGAAGCTGACAAAATGTTGGACGTCTATATTCACGATTATTTA  
GTGAAGAGAGATTTGAAGGCCACCGCTCAGGCTTTCCAAGCTGAAGGAAAAGTATCATCT  
GACCCTGTTGCTATCGATGCTCCTGGTGGTTTTCTGTTTGAATGGTGGTCAGTGTTCTGG  
GATATTTTATTGCCAGGACTAATGAGAAGCACTCTGAAGTAGCTGCAACTTACATTGAG  
CAGACTCAGCTAATGAAGGCAAGGGAGCAGCAACAACAGCAGCAGCCACCACAGTCACAA  
CAGCAGCAGCAACAACAACAACAGCAACAAATGCAGATGCAGCAGATTTTATTGCAGAGG  
CAGGCCGCCCATCAGCAGCAACAGCAACAACAGCAACAGCAACAACAACAGCAGCAGCAA

CAACAGCAACAGCAGCAGCAGCAACAACAACAGCAGCAACAACAACAGGCACATCAGCAG  
CAGCAACGGCGTGAAGGTGGCCACCTCTTAAATGGCTCAGCCAATGGAATTGTTGGAAAC  
GATCCTCTTATGCGACAGAATCCTGGTACTGCCAATGCTTTGGCGACGAAGATGTACGAA  
GAGAAATTAAAGCTCCCTGTTCAAGAGGATTCTTTGGAAGATGCAGCTTTAAAGCAAAGA  
TTTGGGGACAATGTTGGGCAGCTTTTGGATCCAAGTCATGCTTCAATCTTGAAATCAGCT  
GCAGCAGCTGGCCAGCCATCTGGGCAAATGCTTCATGGTTCTGCTGGTGGAGTATCTCCC  
CAAGTTCAAGCACGAAGCCAGCAATTTCCCGGGTCTTCACCAGACATTAAGACTGAGATG  
AATCCTATCCTGAATCCAAGGGCTGCTGGTCCTGAAGGATCTTTGATTGGAATCCCTGGG  
TCAAATCAAGGTGGTAACAATTTGACTTTGAAAGGATGGCCCCTGACGGGCTTCGATCAA  
CTTCGTTCTGGGCTTCTGCAGCAGCCTAAGTCATTTATGCAGGGACCCCAGCCTTTTCAT  
CAATTACAGATGCTAACGCCTCAGCACCAGCAGCAGCTTATGCTTGCCCAACAGAGTTTG  
ACTTCCCCATCCGCCAATGAAGTAGAGAGCAGAAGGCTGAGAATGCTTCTTAATAGCCGA  
AGTTTGTCAATGGGGAAAGATGGTCTCTCCAATTCAGTTGGTGATGTAGTTCCCTAATATT  
GGATCCCCCTTGCAAGCTGGTTGCCCGGTTATACCTCGAGCAGATCCTGAGATGTTGATG  
AAGTTGAAAATCGCACAGATGCAGCAGCAGCAGCAGCAACAGCAGCAGAACAATAATCAA  
ACACCACAGCAGCAGCTATCGCAACATGCTCTCTCTGGTCAGCAGCCTCAGAGTTCAAGT  
CACAATCTCCAGCAAGATAAAATTATGGGTGCTGGCAGTGTAAGTGGTGATGGAAGCATG  
TCAAATTCATTTCCGGGGAAATGAACAGGCTTCAAAAAACCAGACTGGAAGAAAGAGAAAA  
CAGCCTGCATCTTCTGGTCCTGCTAACAGCTCGGGGACTGCGAACACAGCCGGTCCATCT  
CCAAGTTCGGCTCCCTCAACACCCTCAACACATACGCCTGGAGATGTGATGTCAATGCCT  
GCCTTGCTCACAGTGGCAGTTCTTCGAAACCTATGATGATGTTTGGACCTGATAACACT  
GGTACTCTGACATCACCATCAAACCAGTTGTGGGATGACAAAGATCTTGTACAAACTGAT  
ATGGATCGTTTTGTGGATGATGTTGAAGATAATGTAGAGTCTTTTTATCACATGATGAT  
GCTGACCCCCGAGATACAGTTGGTCGTTGTATGGATGTCAGCAAGGGTTTACATTTACG  
GAAGTGAAGTCTGTTCTGCTAGTTCTAGTAAAGTCGTGTGTTGCCATTTCTCATCAGAT  
GGAAAGTTGCTTGCCAGTGGTGGTCATGATAAAAAGGCTGTTTTATGGTACACAGATAAT  
TAAAACCTAAAACAACCTCTTGAGGAACACACATCACTTATTACTGATGTTTCGTTTCAGC  
CCTAGCATGGCTCGCCTTGCCACATCATCCTTCGATAAAACTGTCAGAGTGTGGGATGTC  
GATAATCCTTCGTATTCTCTTCGGACCTTTACTGGACATTCTGCTGGTGTAATGTCATTG  
GACTTCCATCCCAACAAGGATGACCTCATCTGCTCATGTGATGGTGATGGTGAGATAAGA  
TACTGGAGTATCACTAATGGAAGCTGCCAAAGAGTTTCAAGGGTGAACGACCCAAGTG  
AGATTCCAACCACGTCTTGGAAGGTATCTTGCAGCAGCAGCTGAAAACGTTGTGTCAATA  
CTGGATGCGGAGACGCAAGCCTGTCGACATTCATTAAAGGGACATACGAAACATATTAC  
TCCGTTTGCTGGGACCCCTTCTGGTGAAGTCTCTAGCATCTGTTAGTGAAGATTCAAGTGAAG  
GTGTGGACGTTGAGATCCGGAAGTGAAGGCGAATGTTTACACAAGCTTAGTTGCAATGGG  
AACAAATCCATTCTTGCCTTTCCACCCTACGTATTCTTCATTGCTTGTGATTGGTTGT  
TATCAGTCGCTGGAGCTGTGGAACATGAGTGAGAACAAGACGATGACACTCTCTGCGCAC  
GAAGGATTGATTGCTTCGTTGGCTGTATCGACGGTGCGGGCGTGGTGGCGTCTGCTAGT  
CACGATAAGATTGTTAAGCTGTGGAAG

>Unigene27774

ATGGCGCTTCAGTTGTGGGAAACACTGAAAGAATCTATAACAGTCTACACAGGCCTCTCT  
CCGGCTACTTTCTTCACTGTTCTTGCTTGGGCTCACCCTTTACTACTTTGTTTCCAAT  
TTGTTTGGTTCCTCTGATGATGGACATGTCCAGCACACTTCCAGAAGCTTCGAGGAGCAC

[illegible]
